# Supplementary material for: Barley Seeds miRNome Stability during Long-Term Storage and Aging
Source: MDPI journal article supplement (doi:10.3390/ijms22094315), 2021-04-21

Hvu-new1

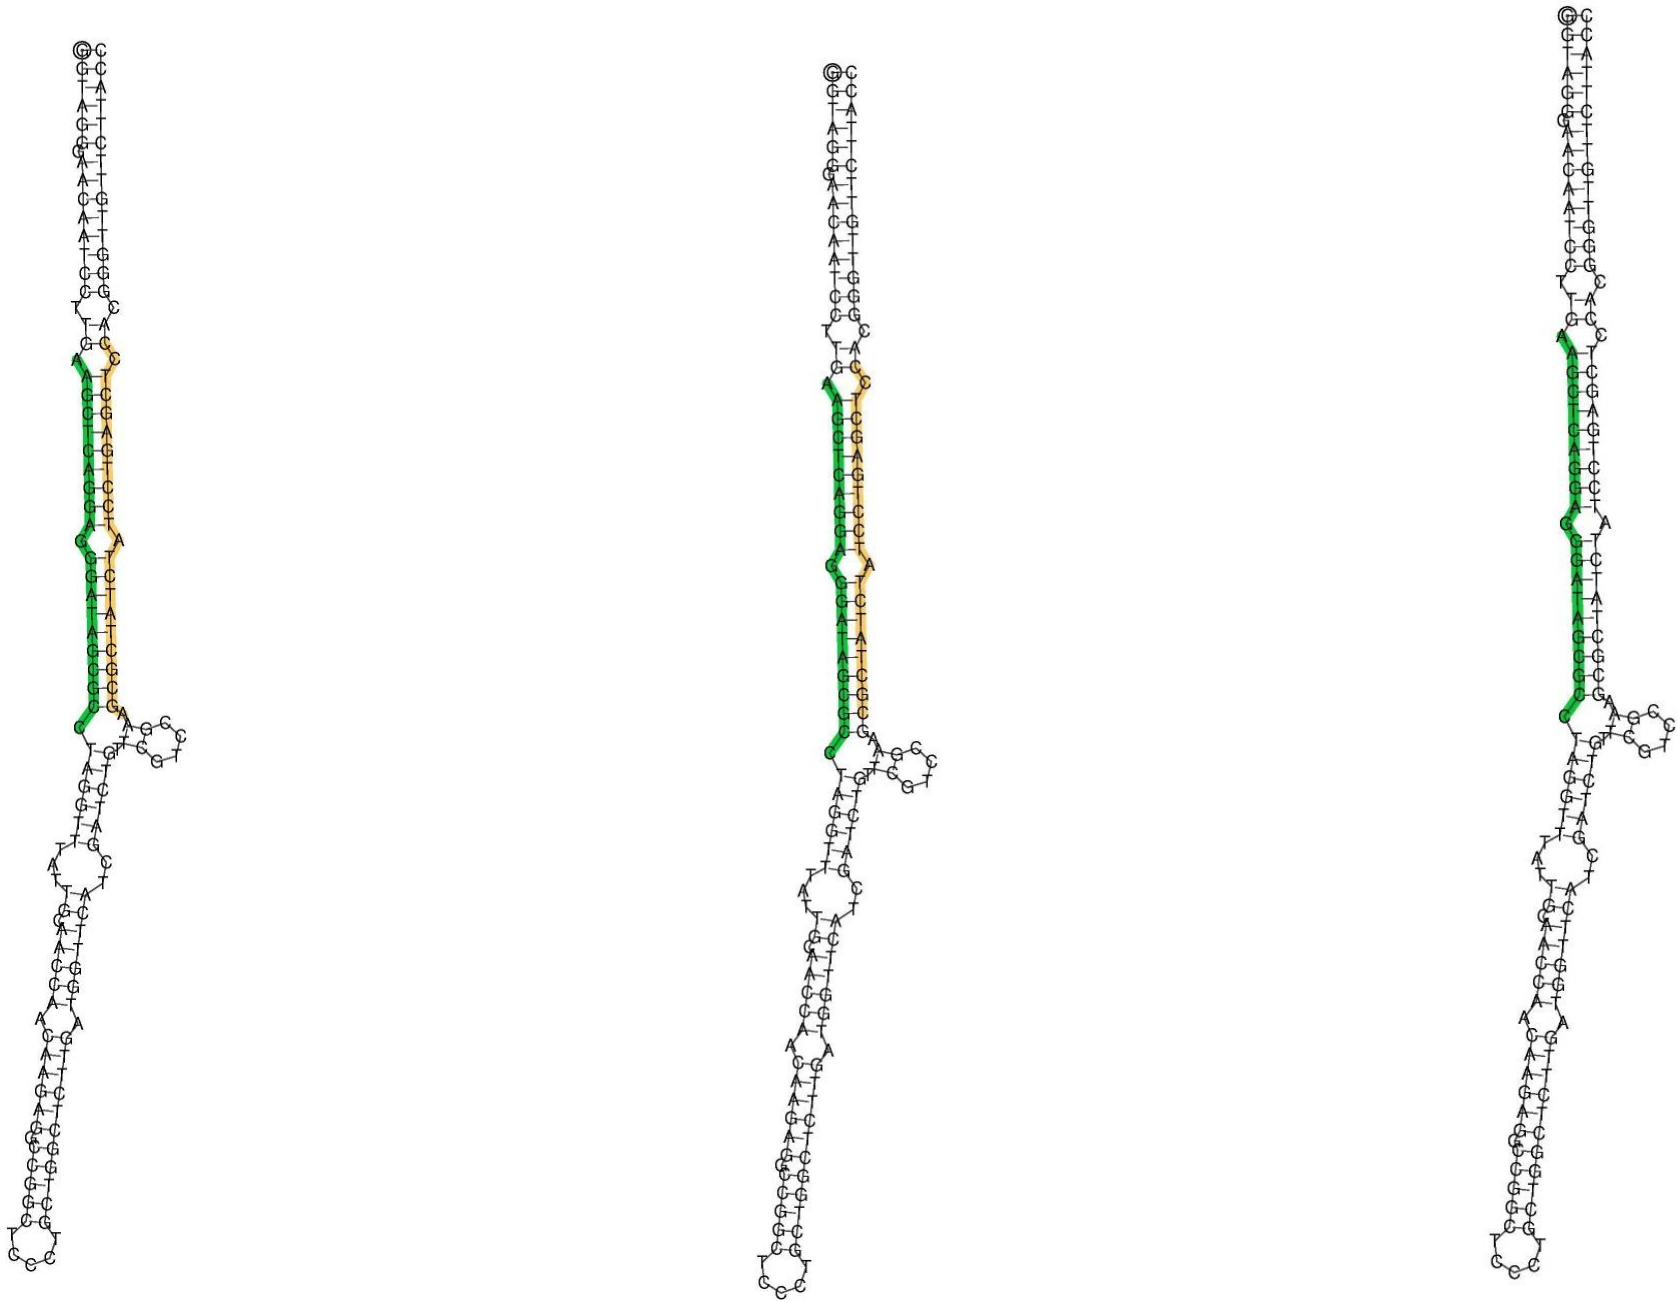

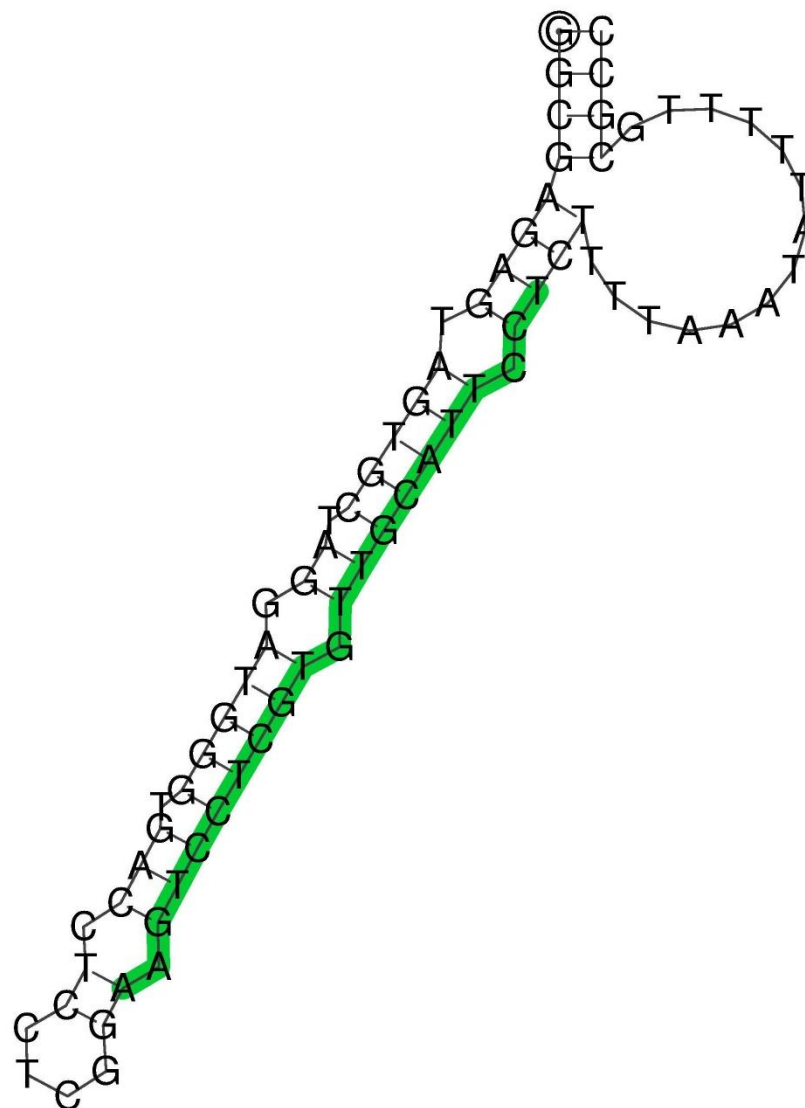

Hvu-new3

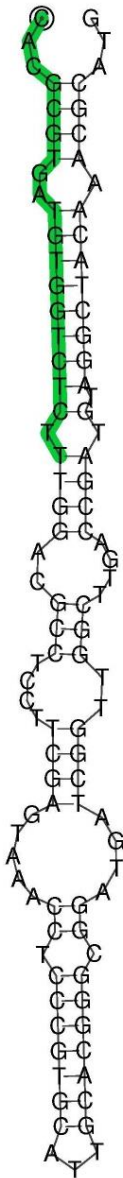

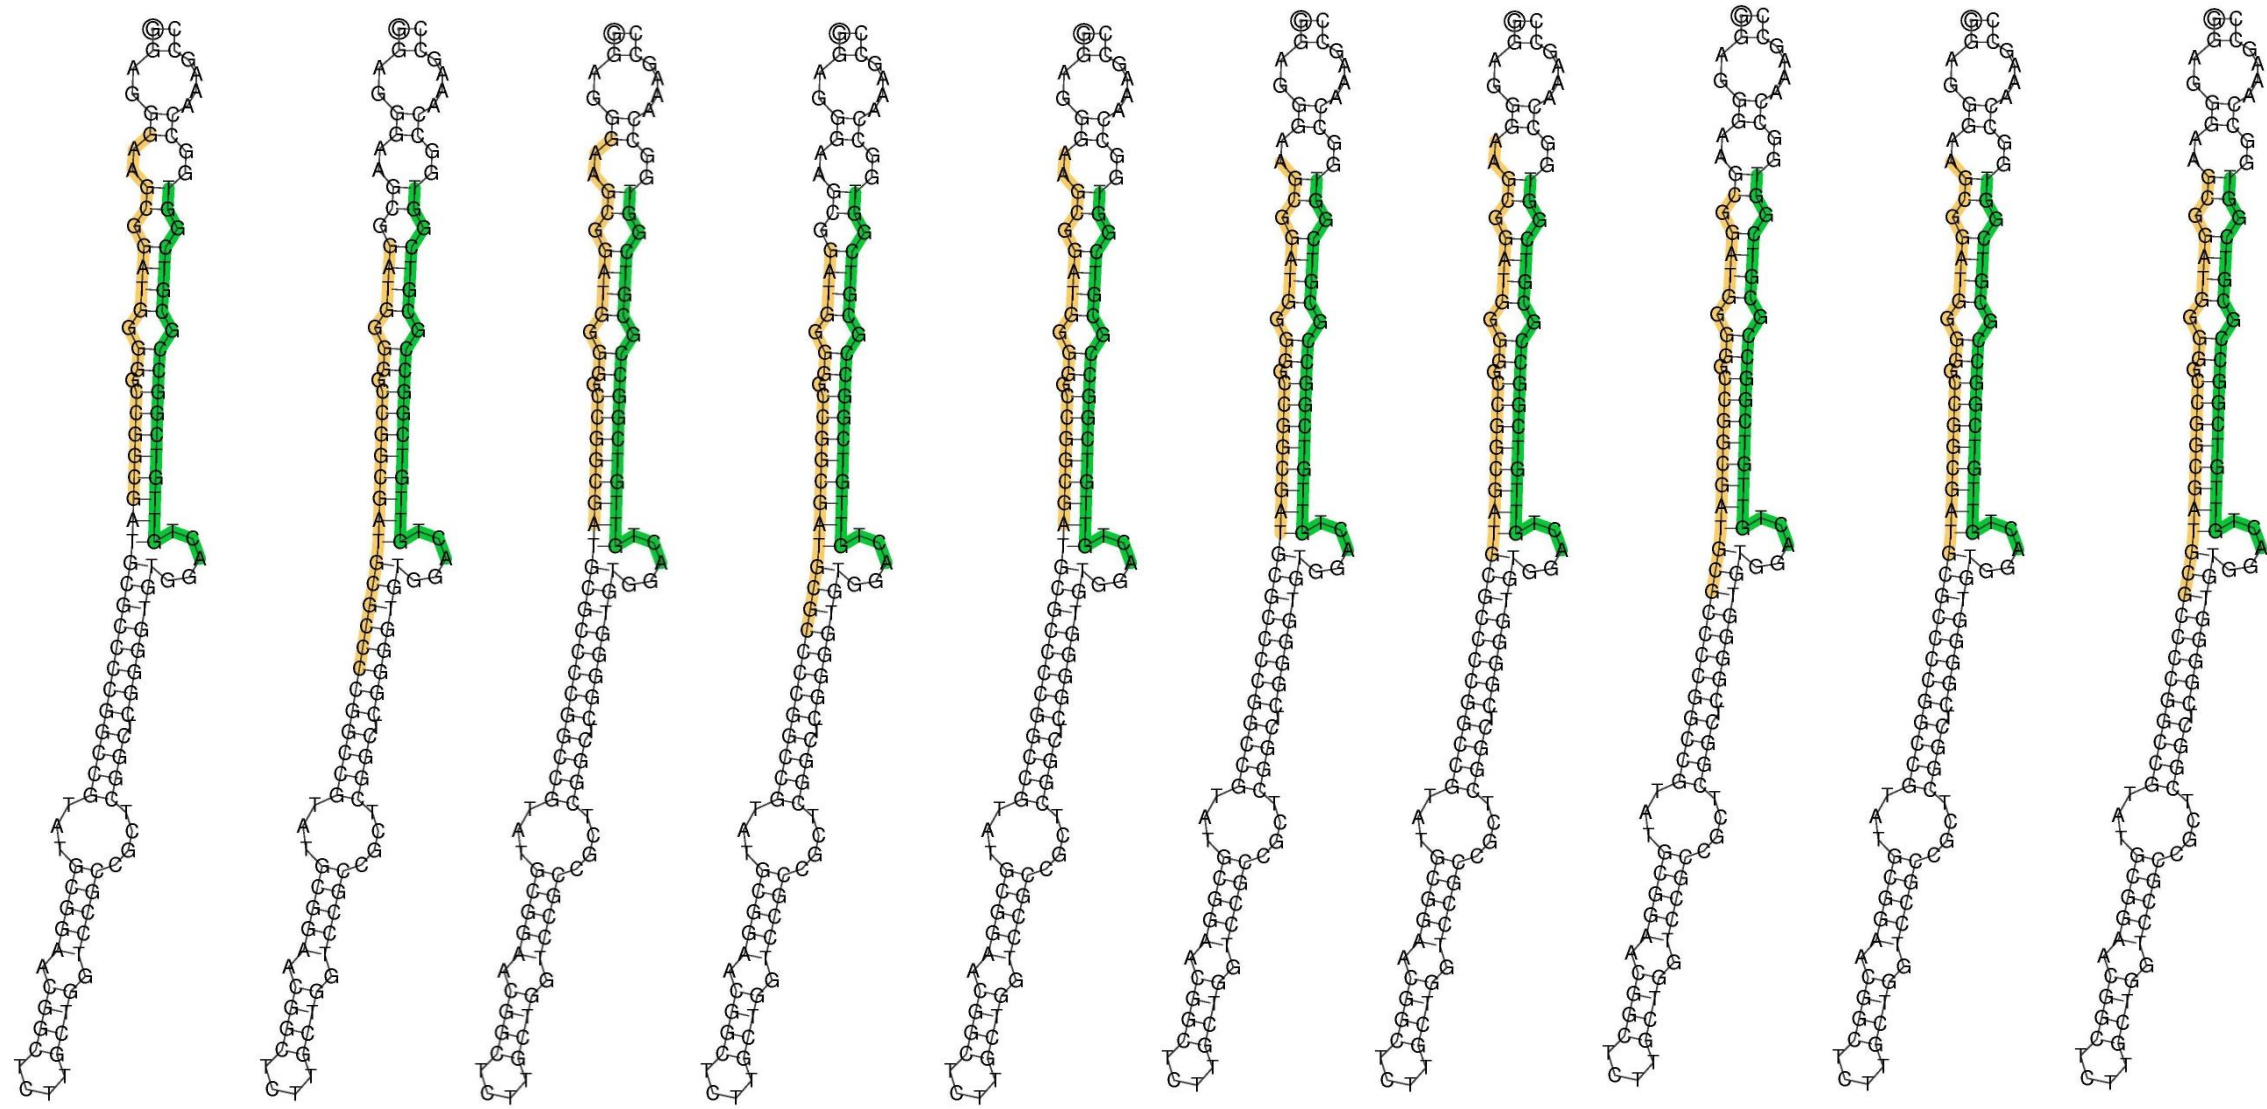

Hvu-new4

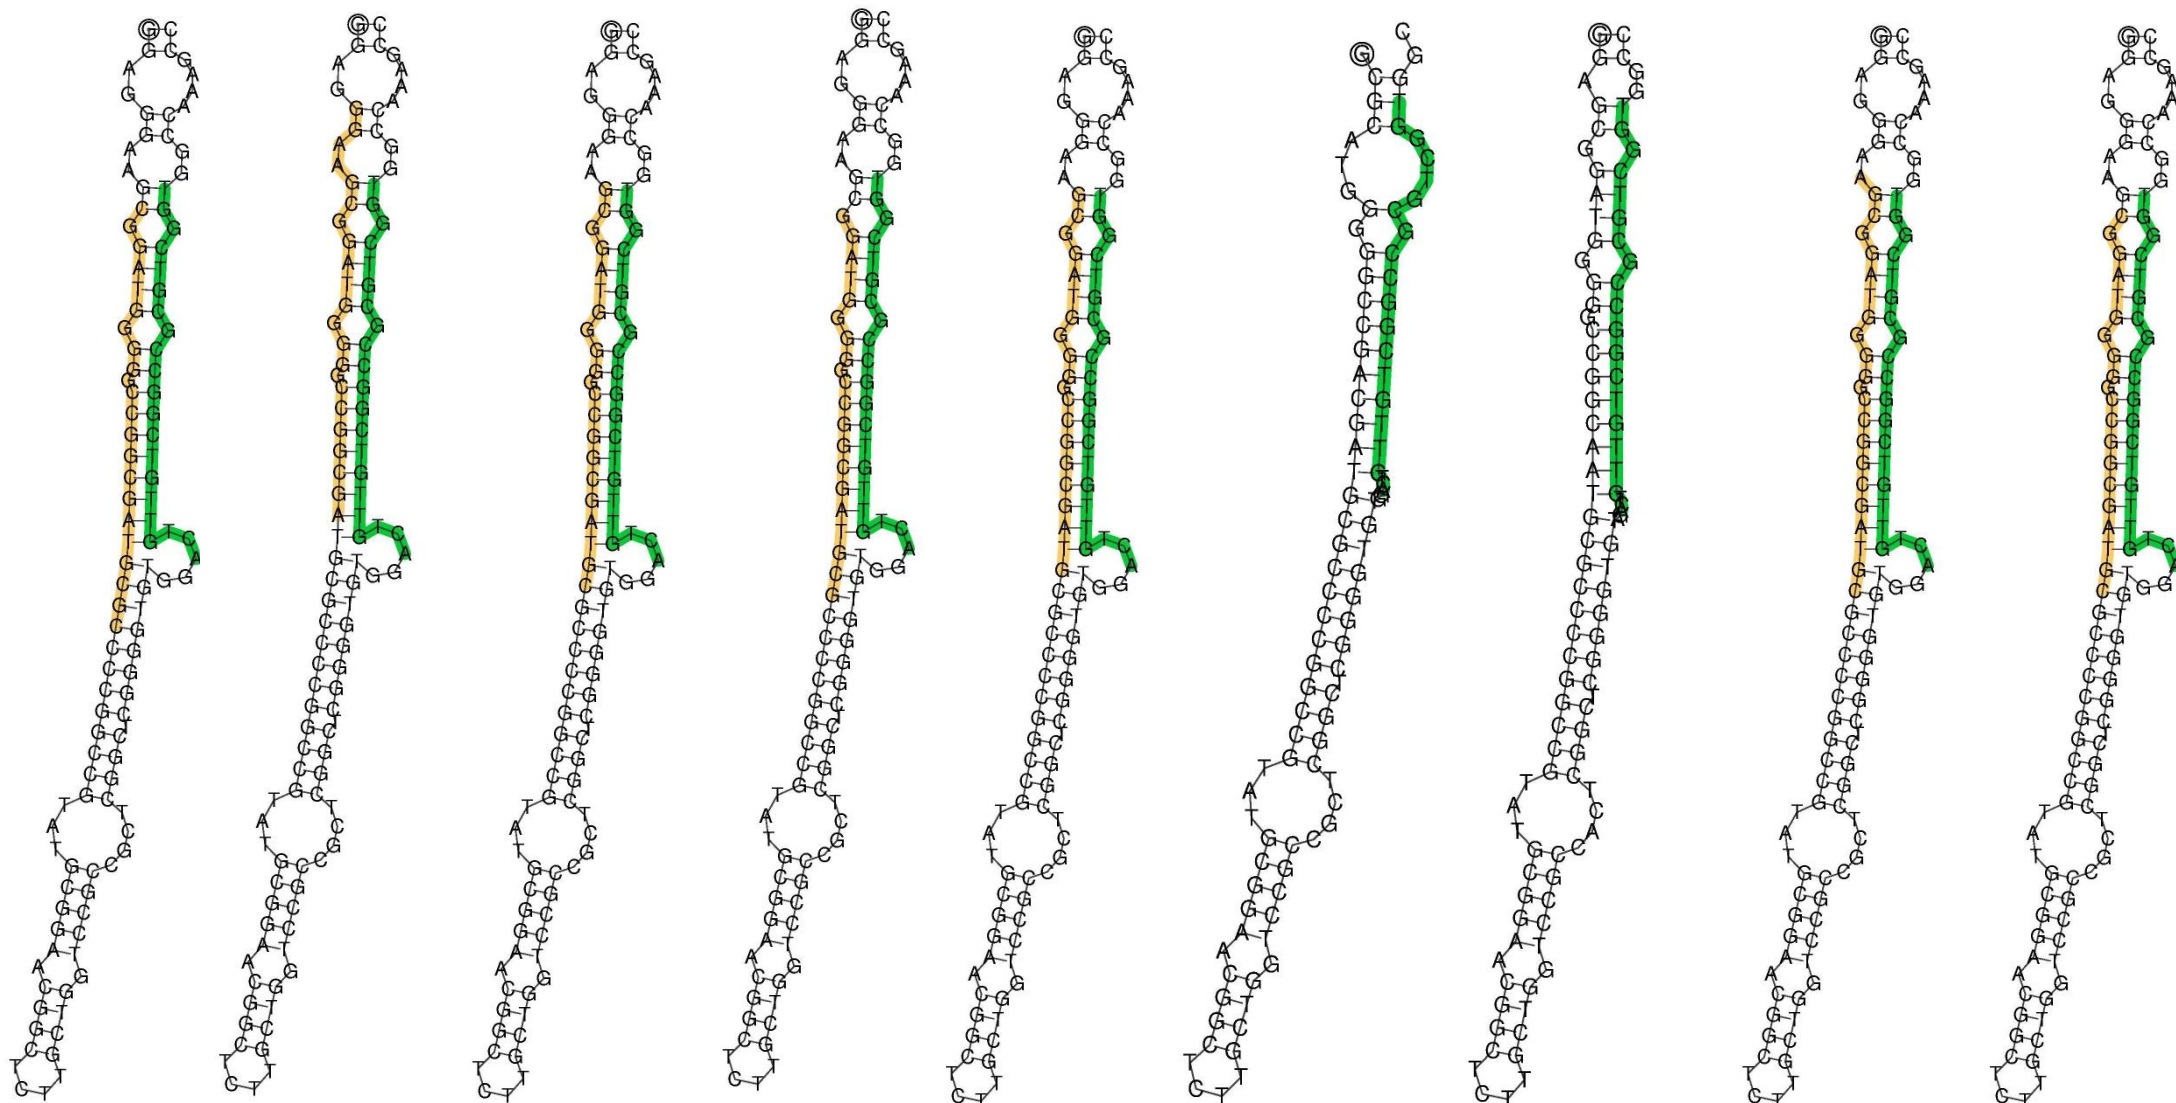

Hvu-new5

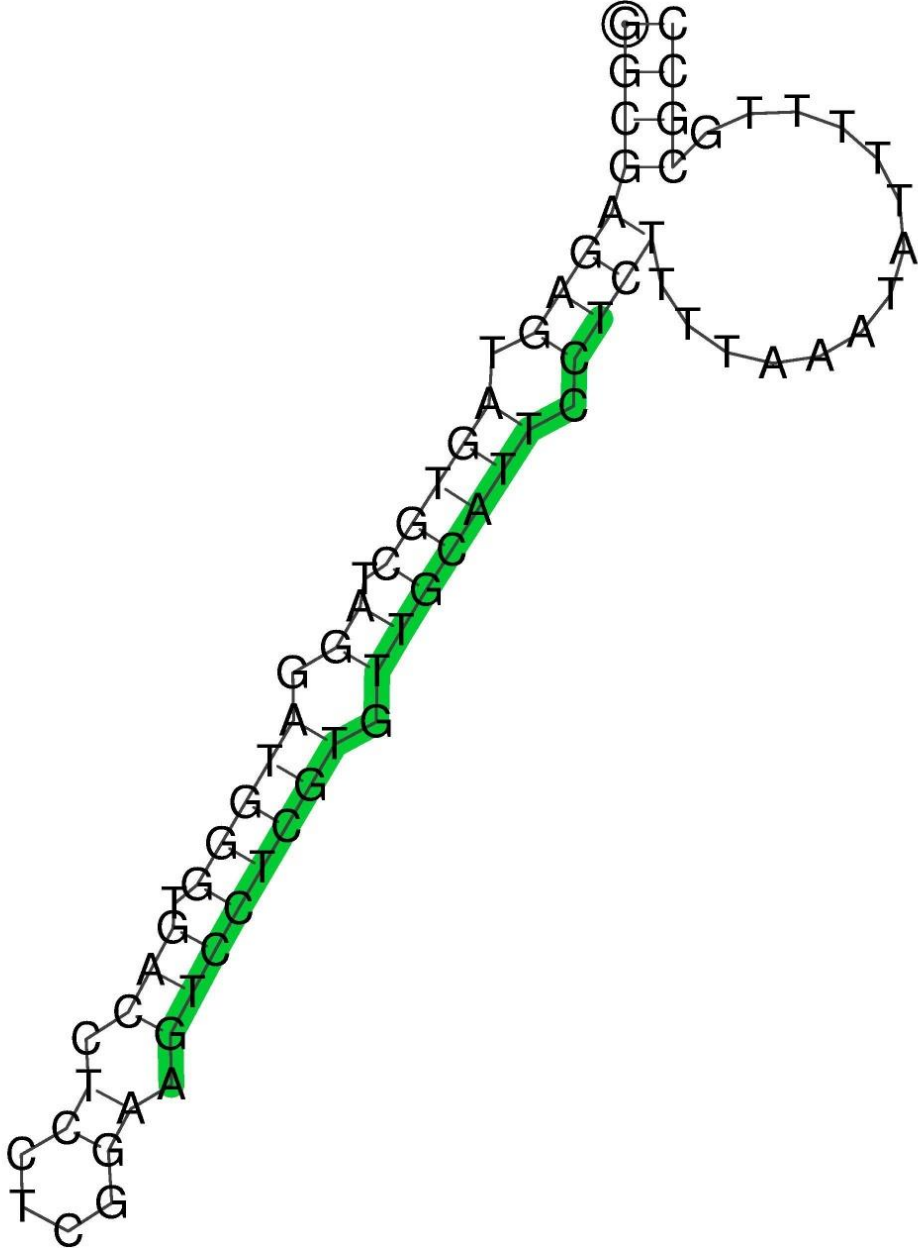

Hvu-new6

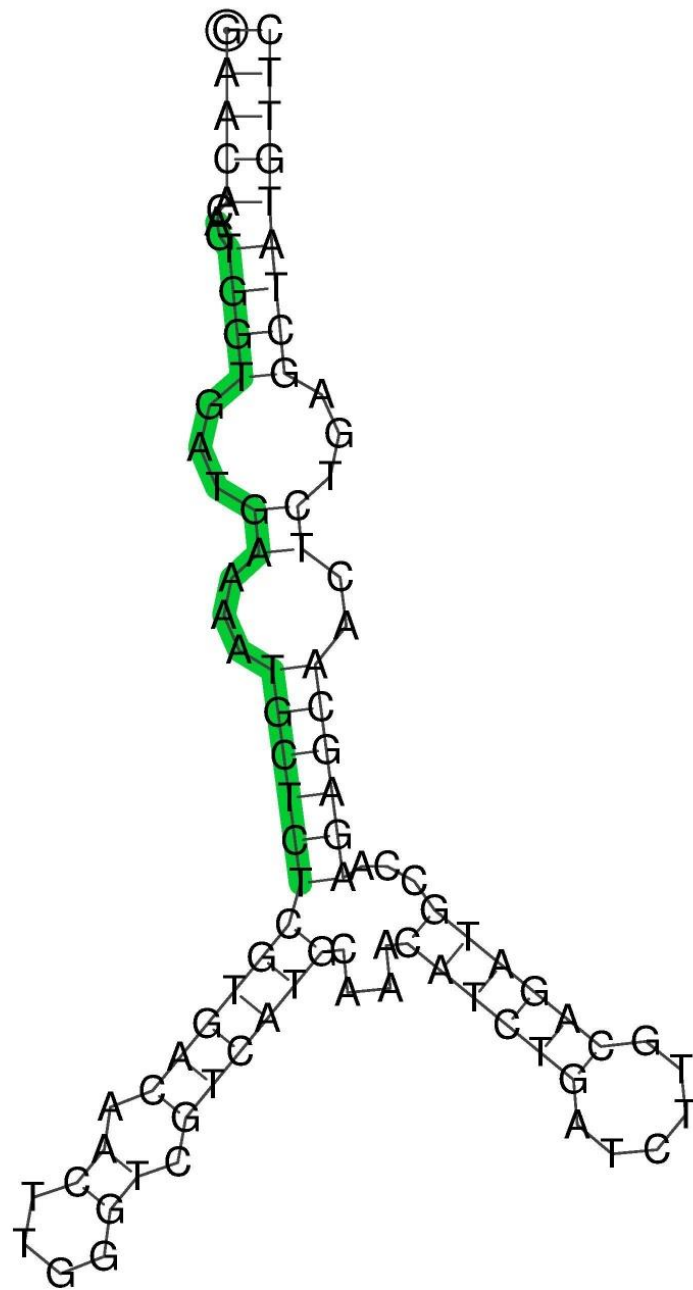

Hvu-new7

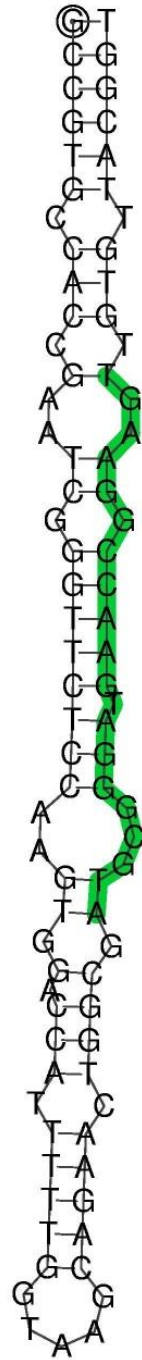



Hvu-new8

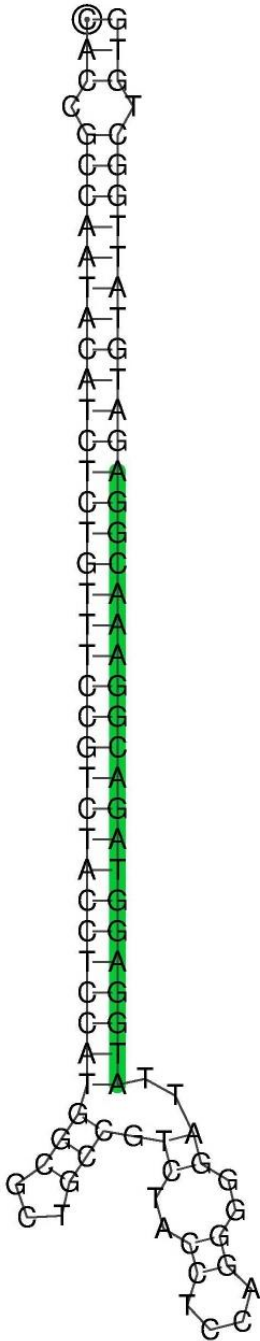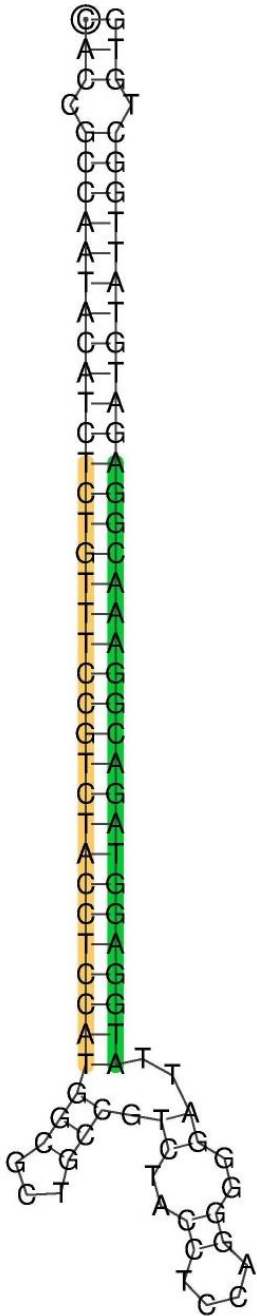

Hvu-new9

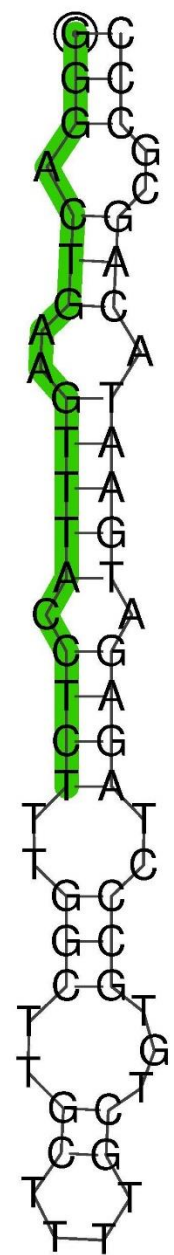

Hvu-new10

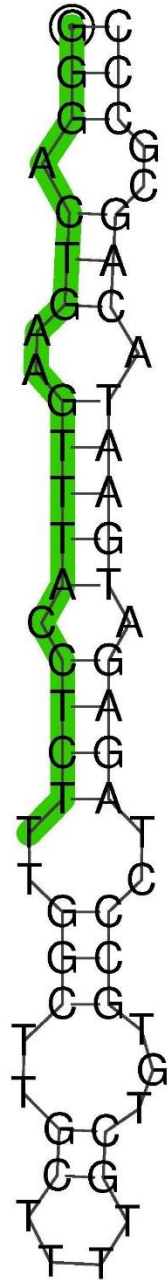

Hvu-new11

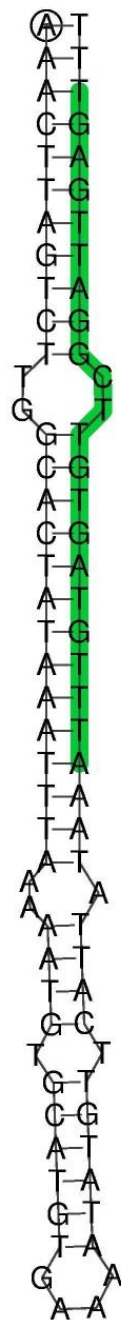

Hvu-new12

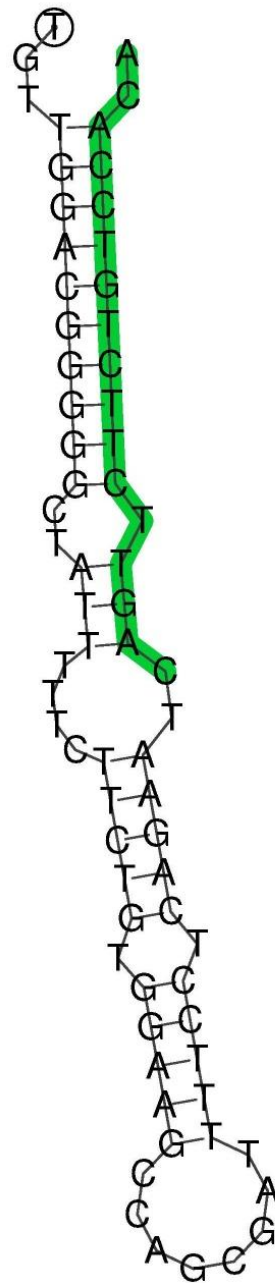

Hvu-new13

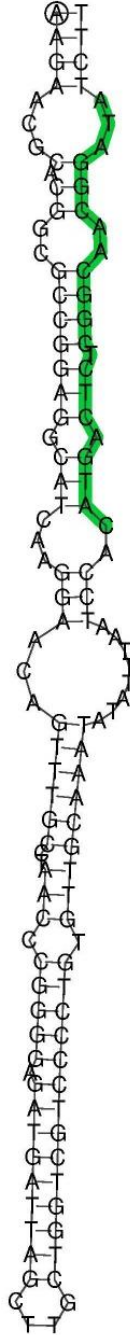

Hvu-new14

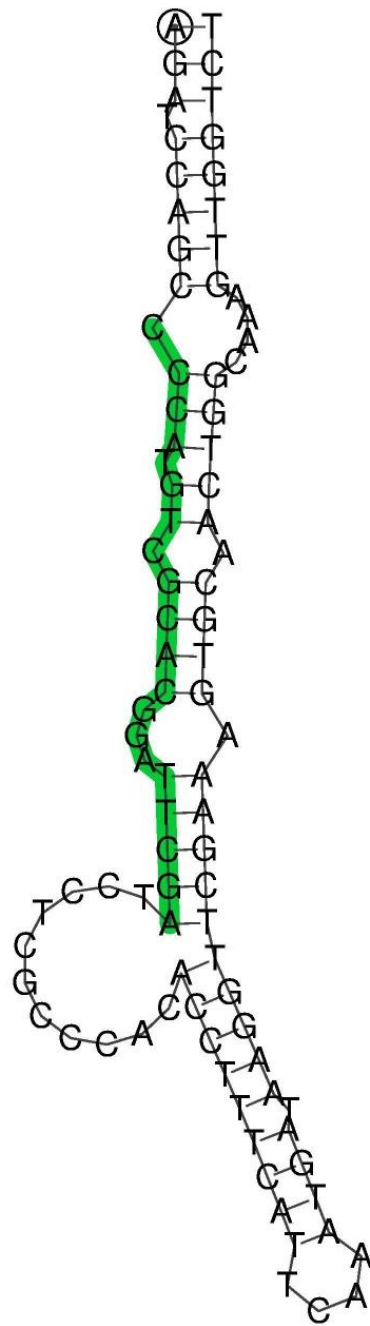

Hvu-new15

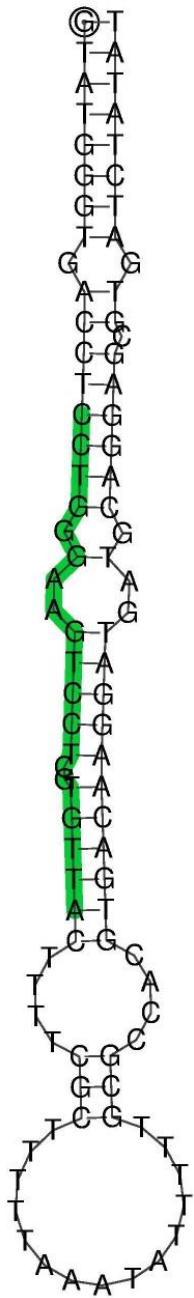



Hvu-new16

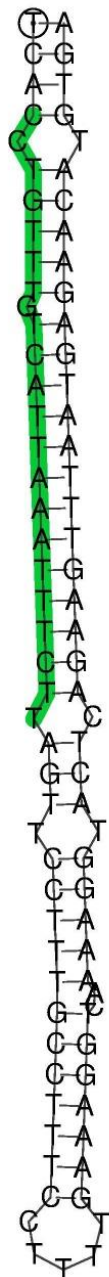

Hvu-new17

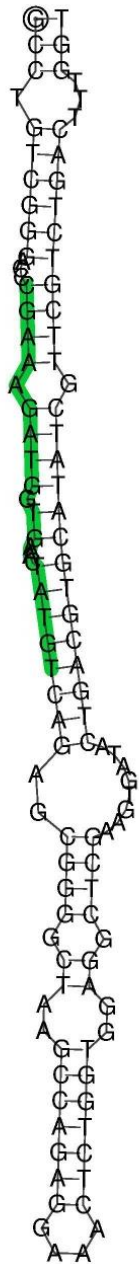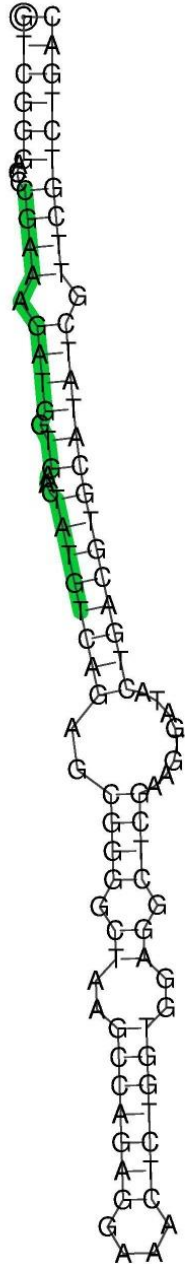

Hvu-new18

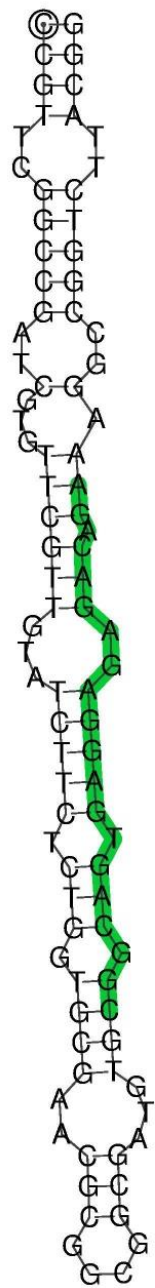

Hvu-new19

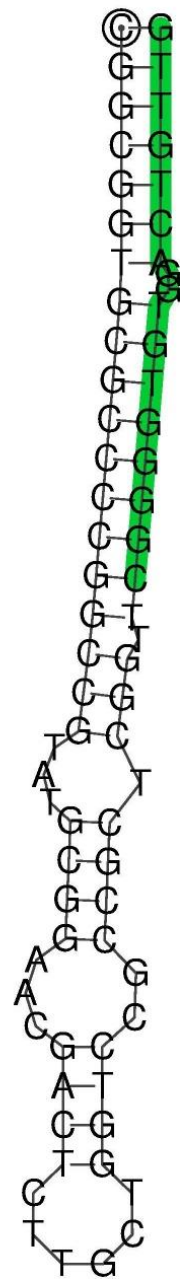

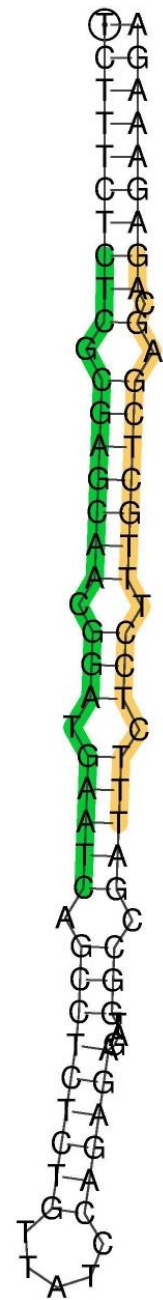

Hvu-new21

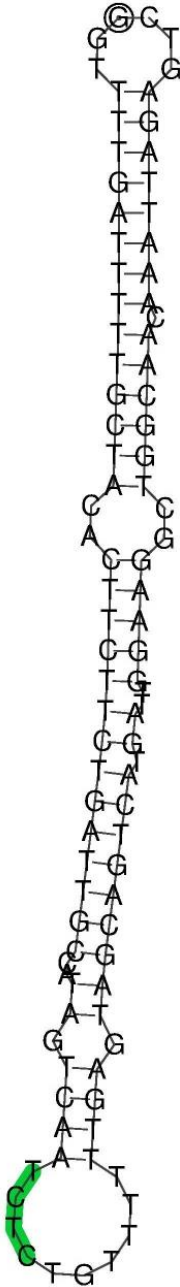

Hvu-new22

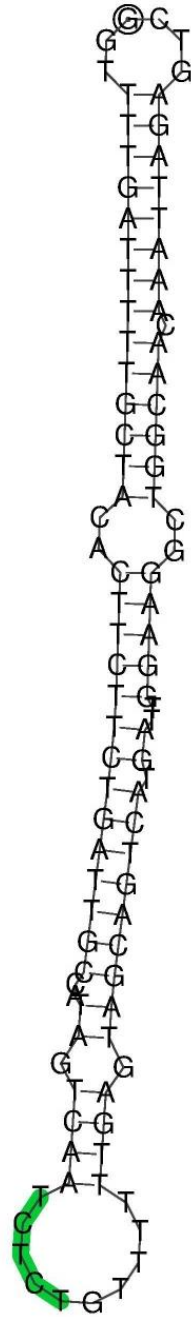

Hvu-new23

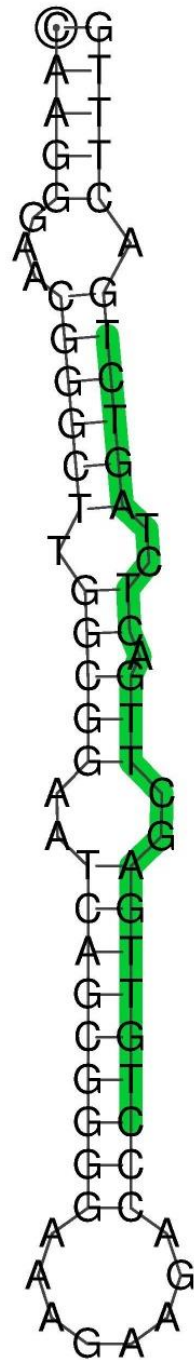



Hvu-new24

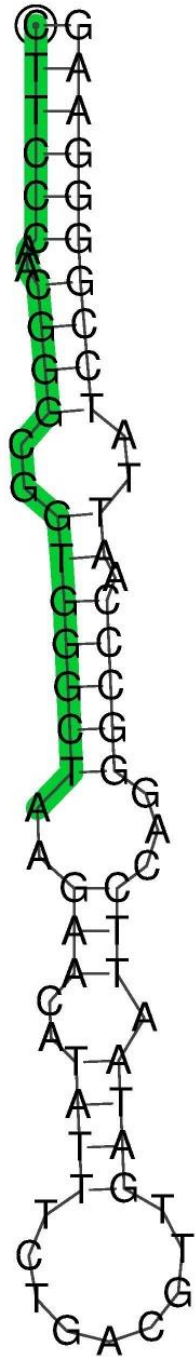

Hvu-new25

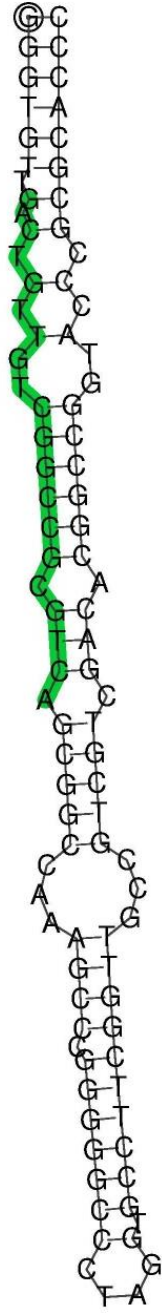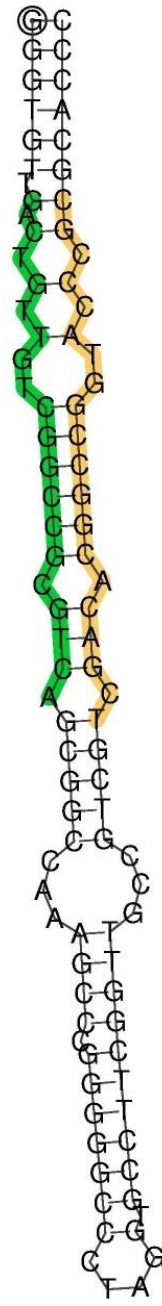

Hvu-new26

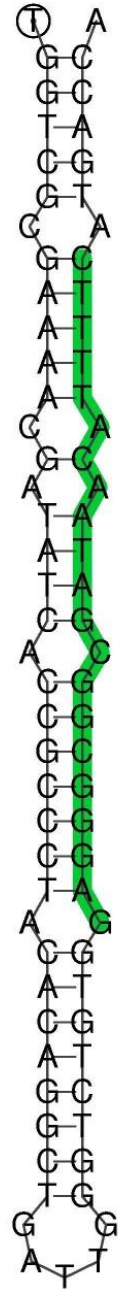

Hvu-new27

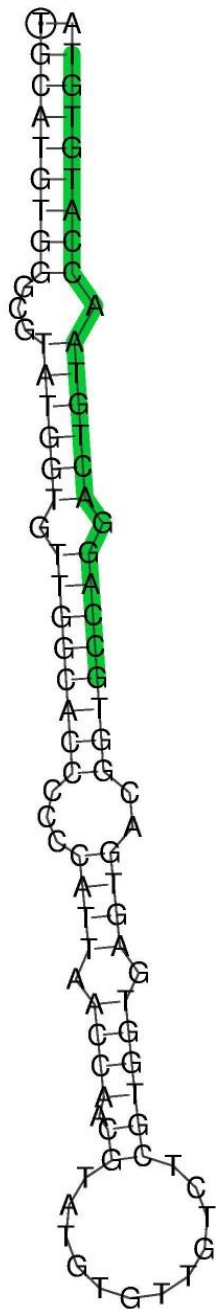

Hvu-new28

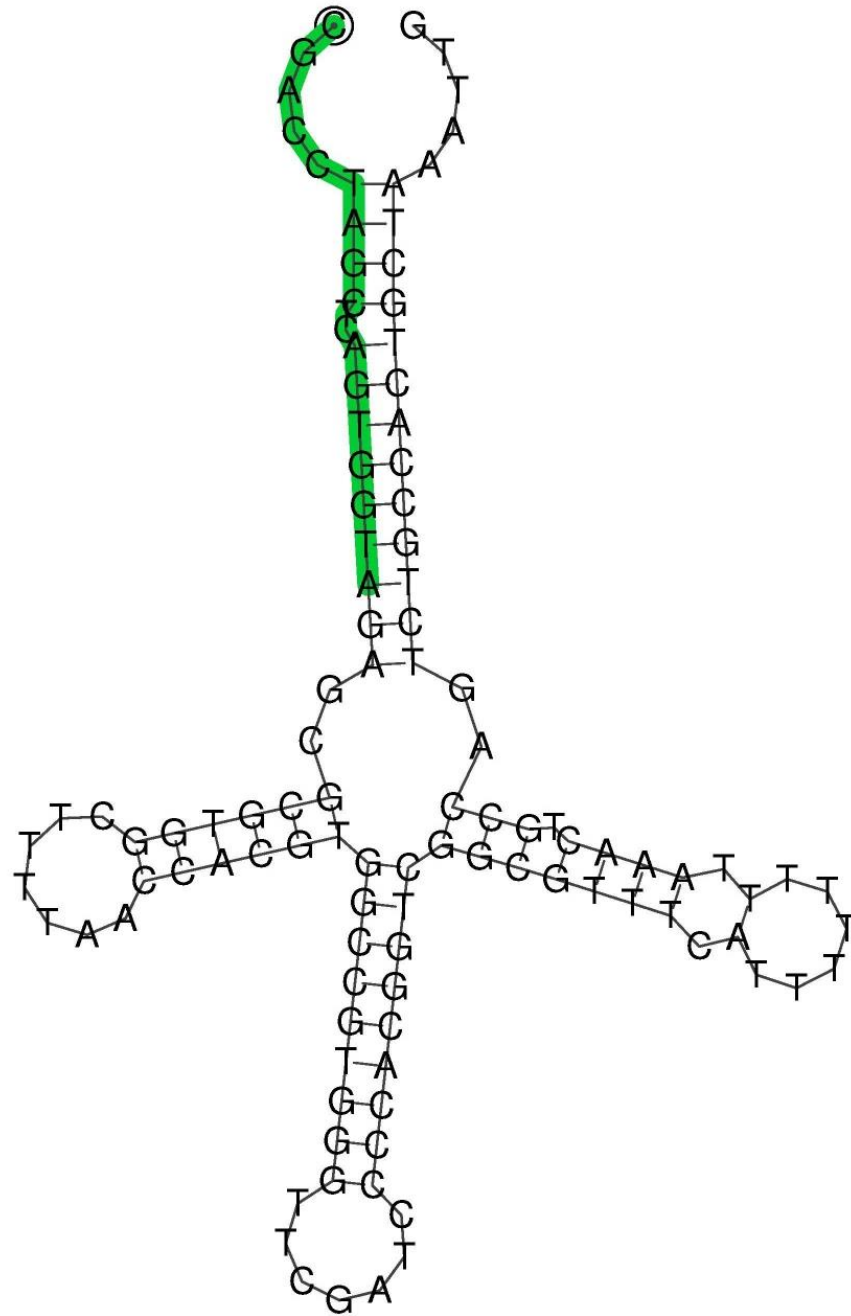

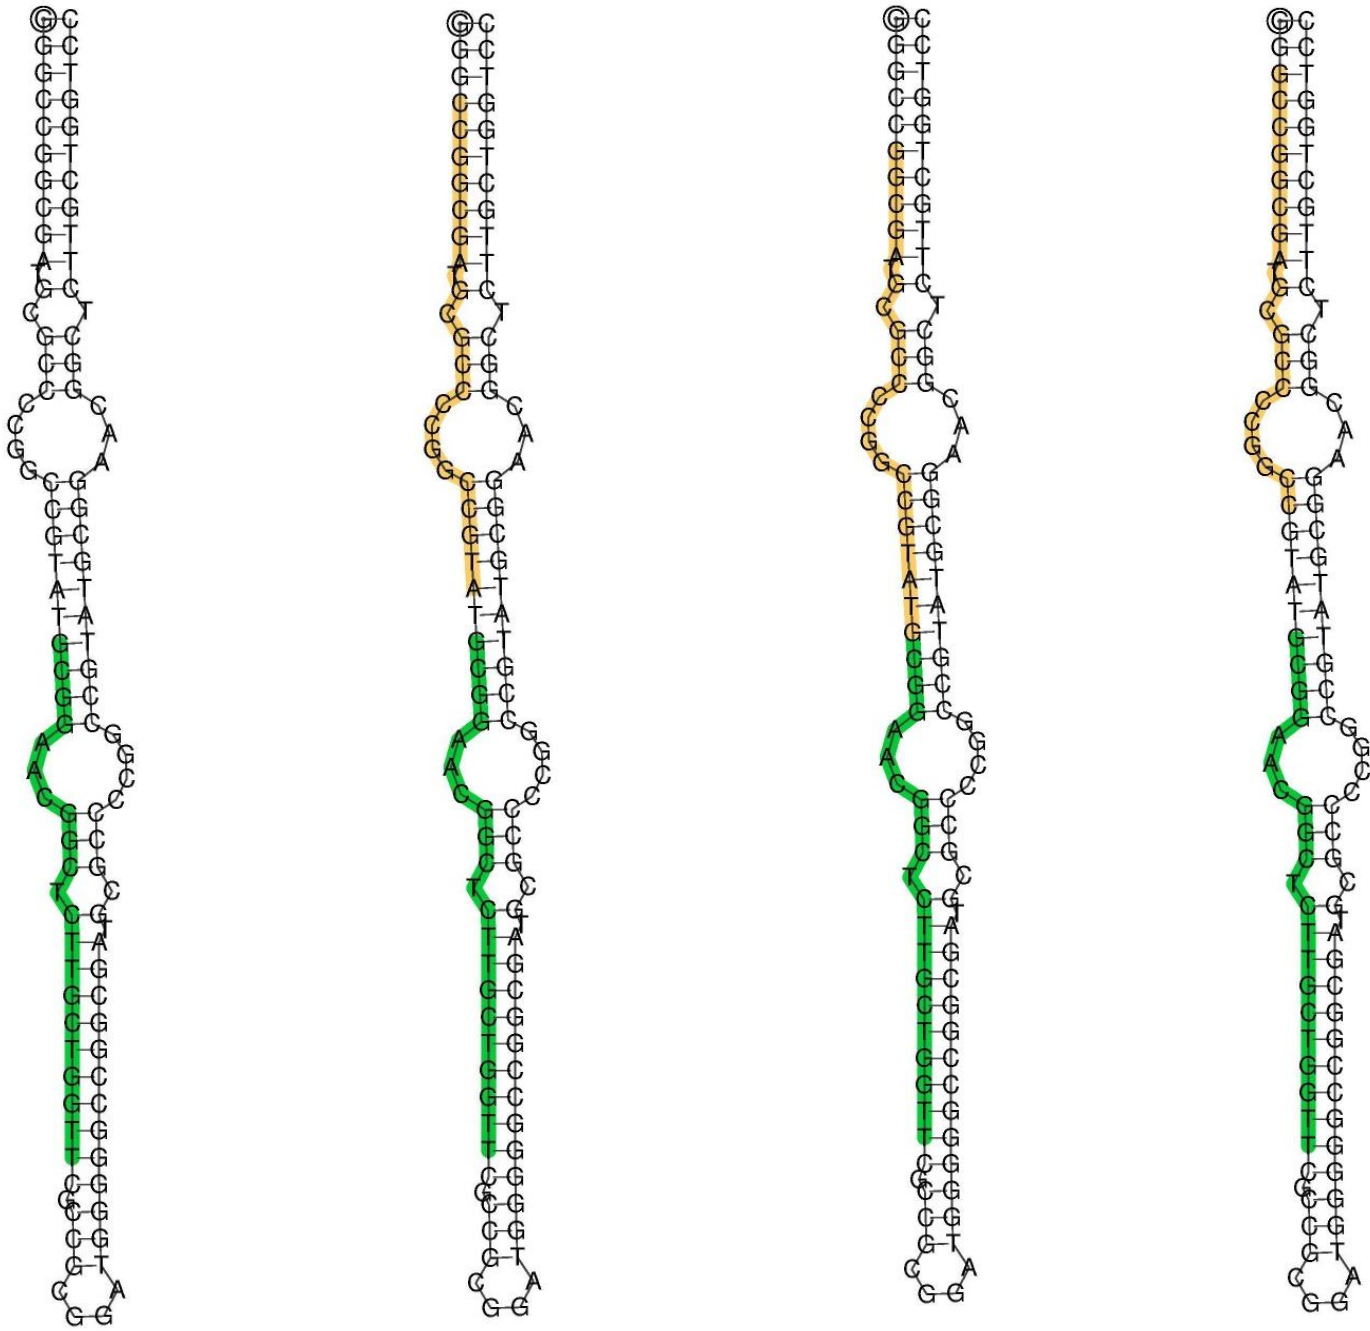

Hvu-new30

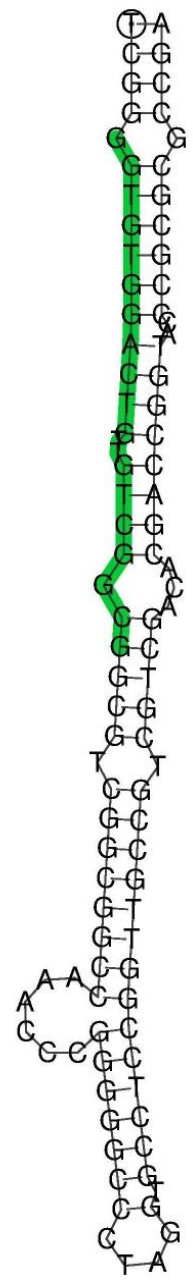

Hvu-new31

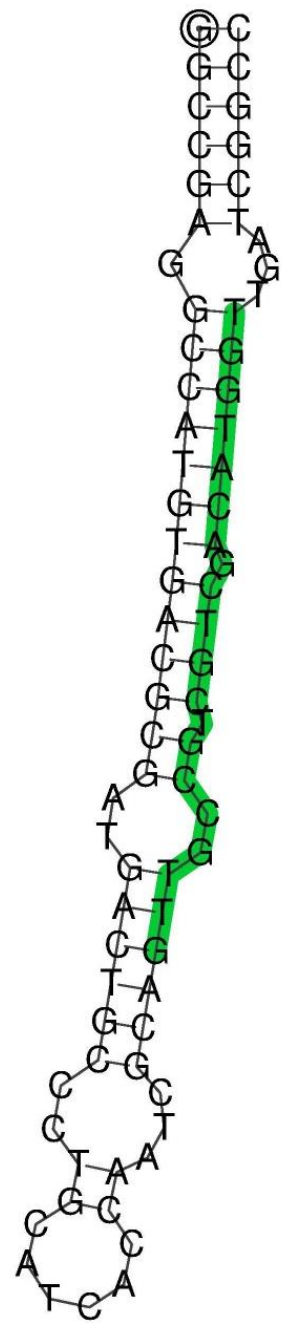



Hvu-new32

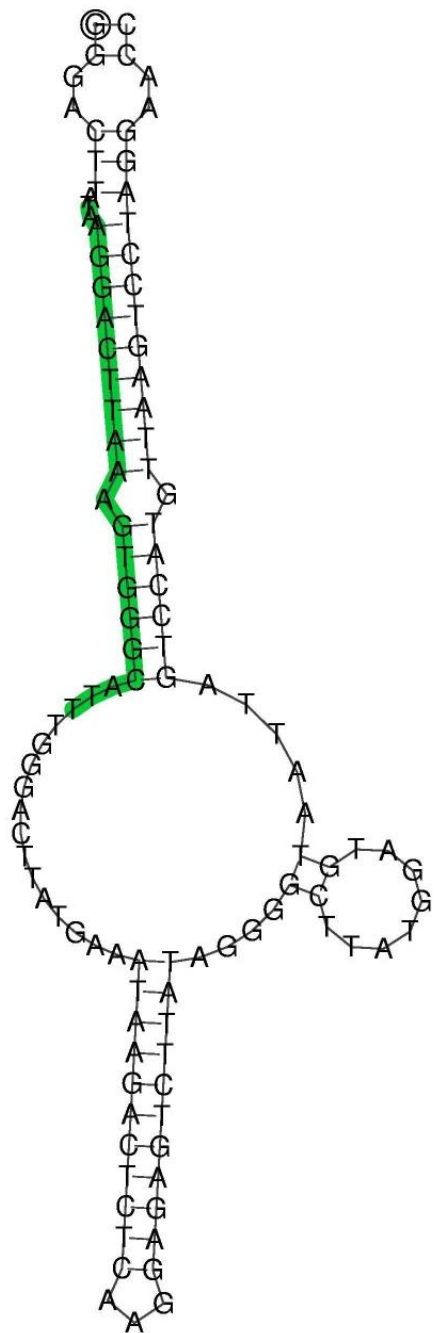

Hvu-new33

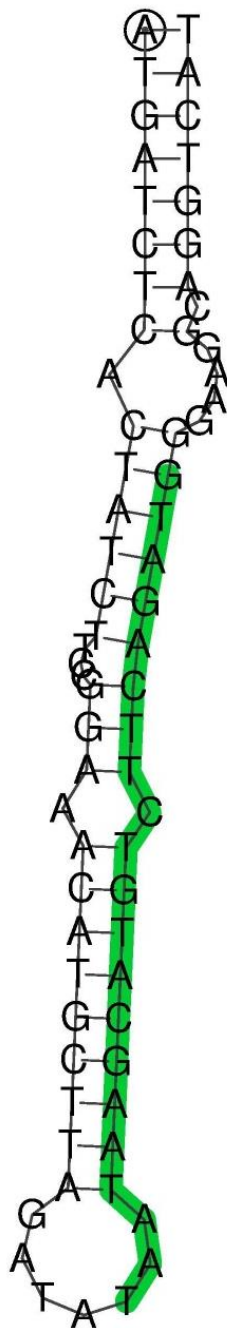

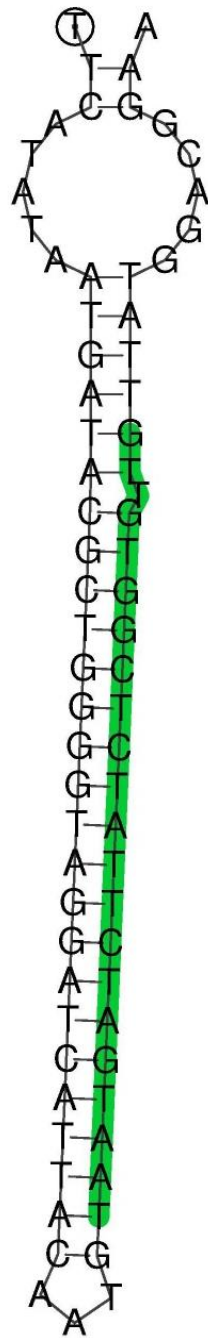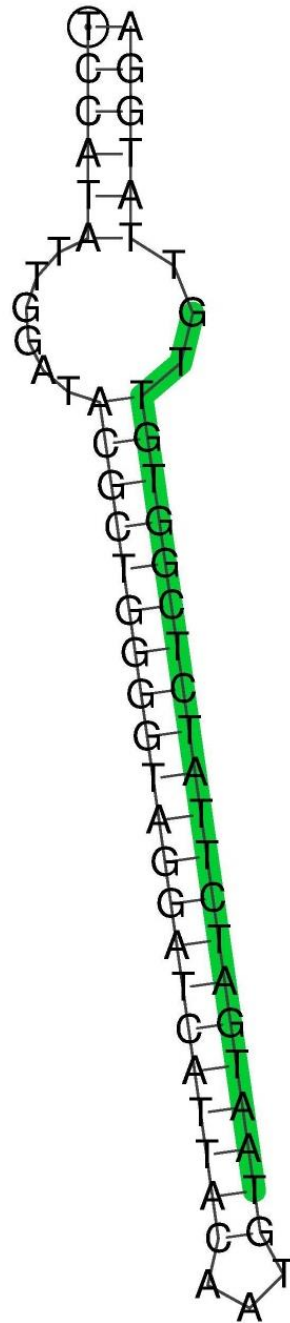

Hvu-new35

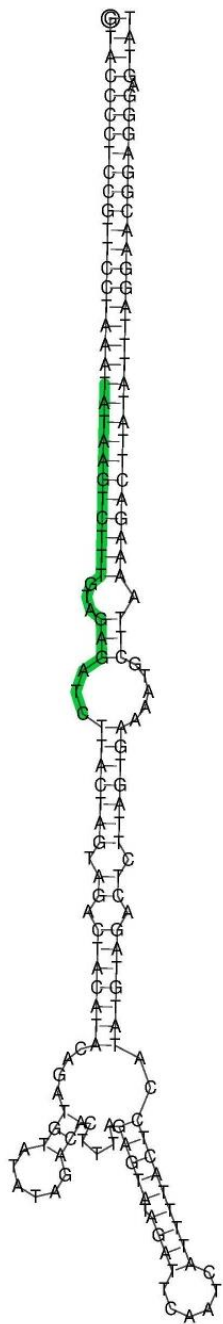

Hvu-new36

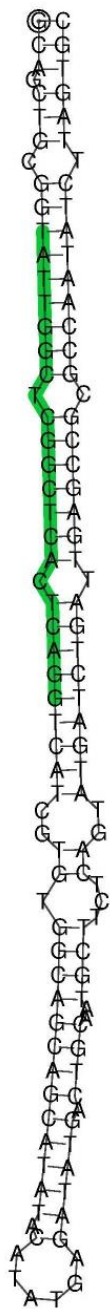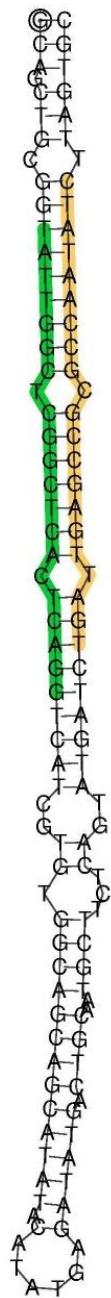

Hvu-new37

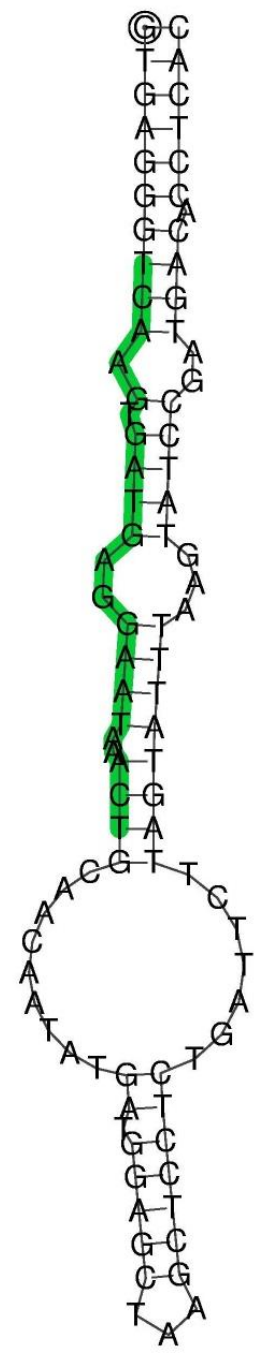

Hvu-new38

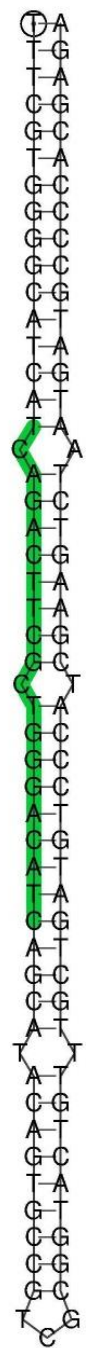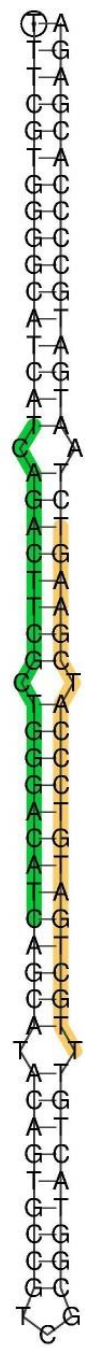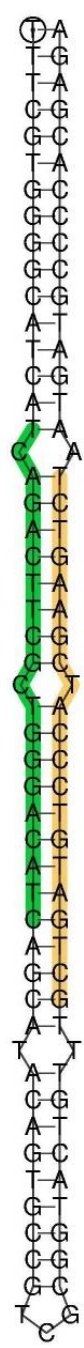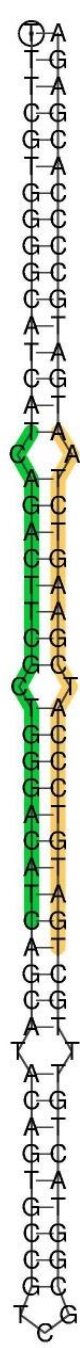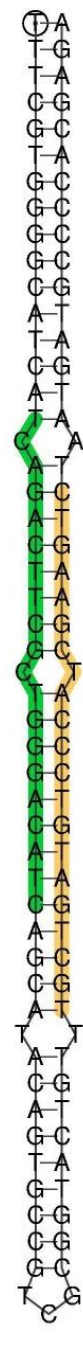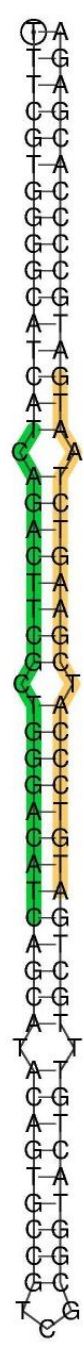

Hvu-new39

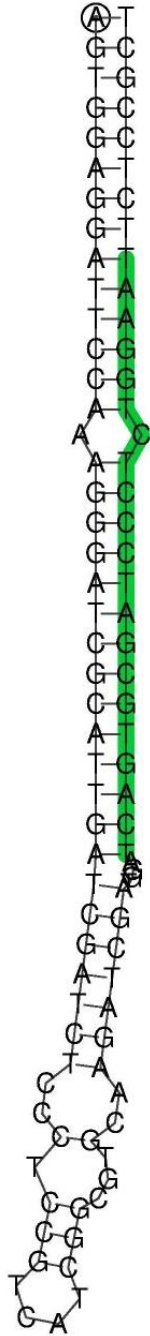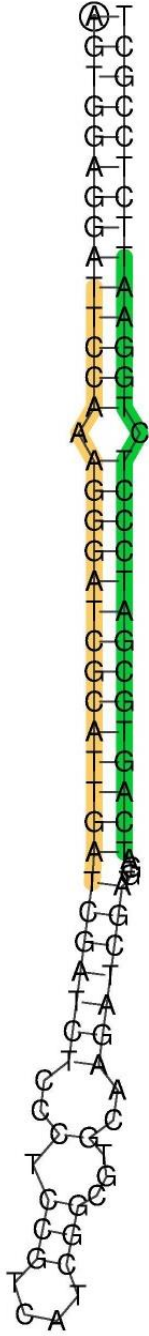



Hvu-new40

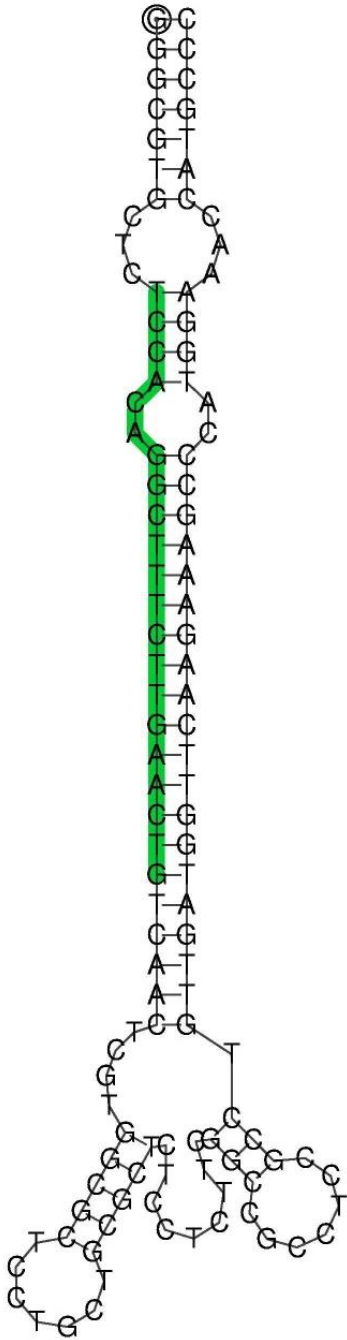

Hvu-new41

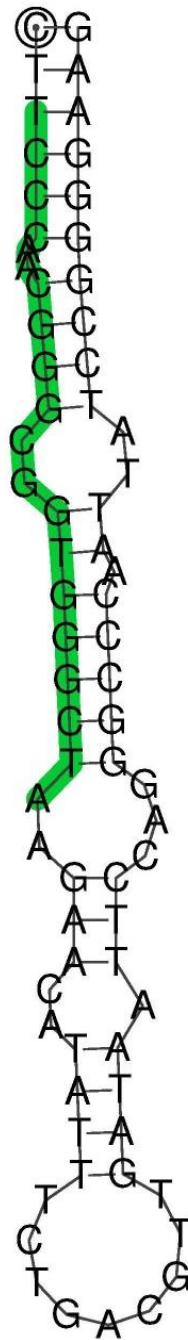

Hvu-new42

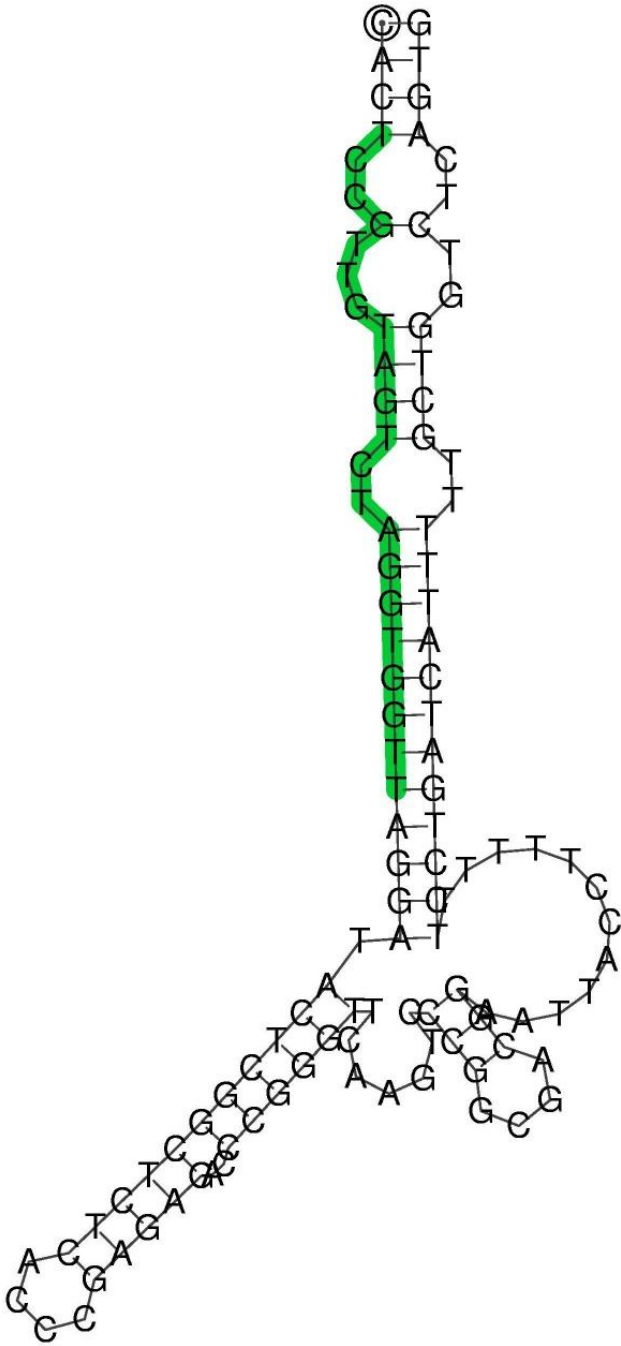

Hvu-new43

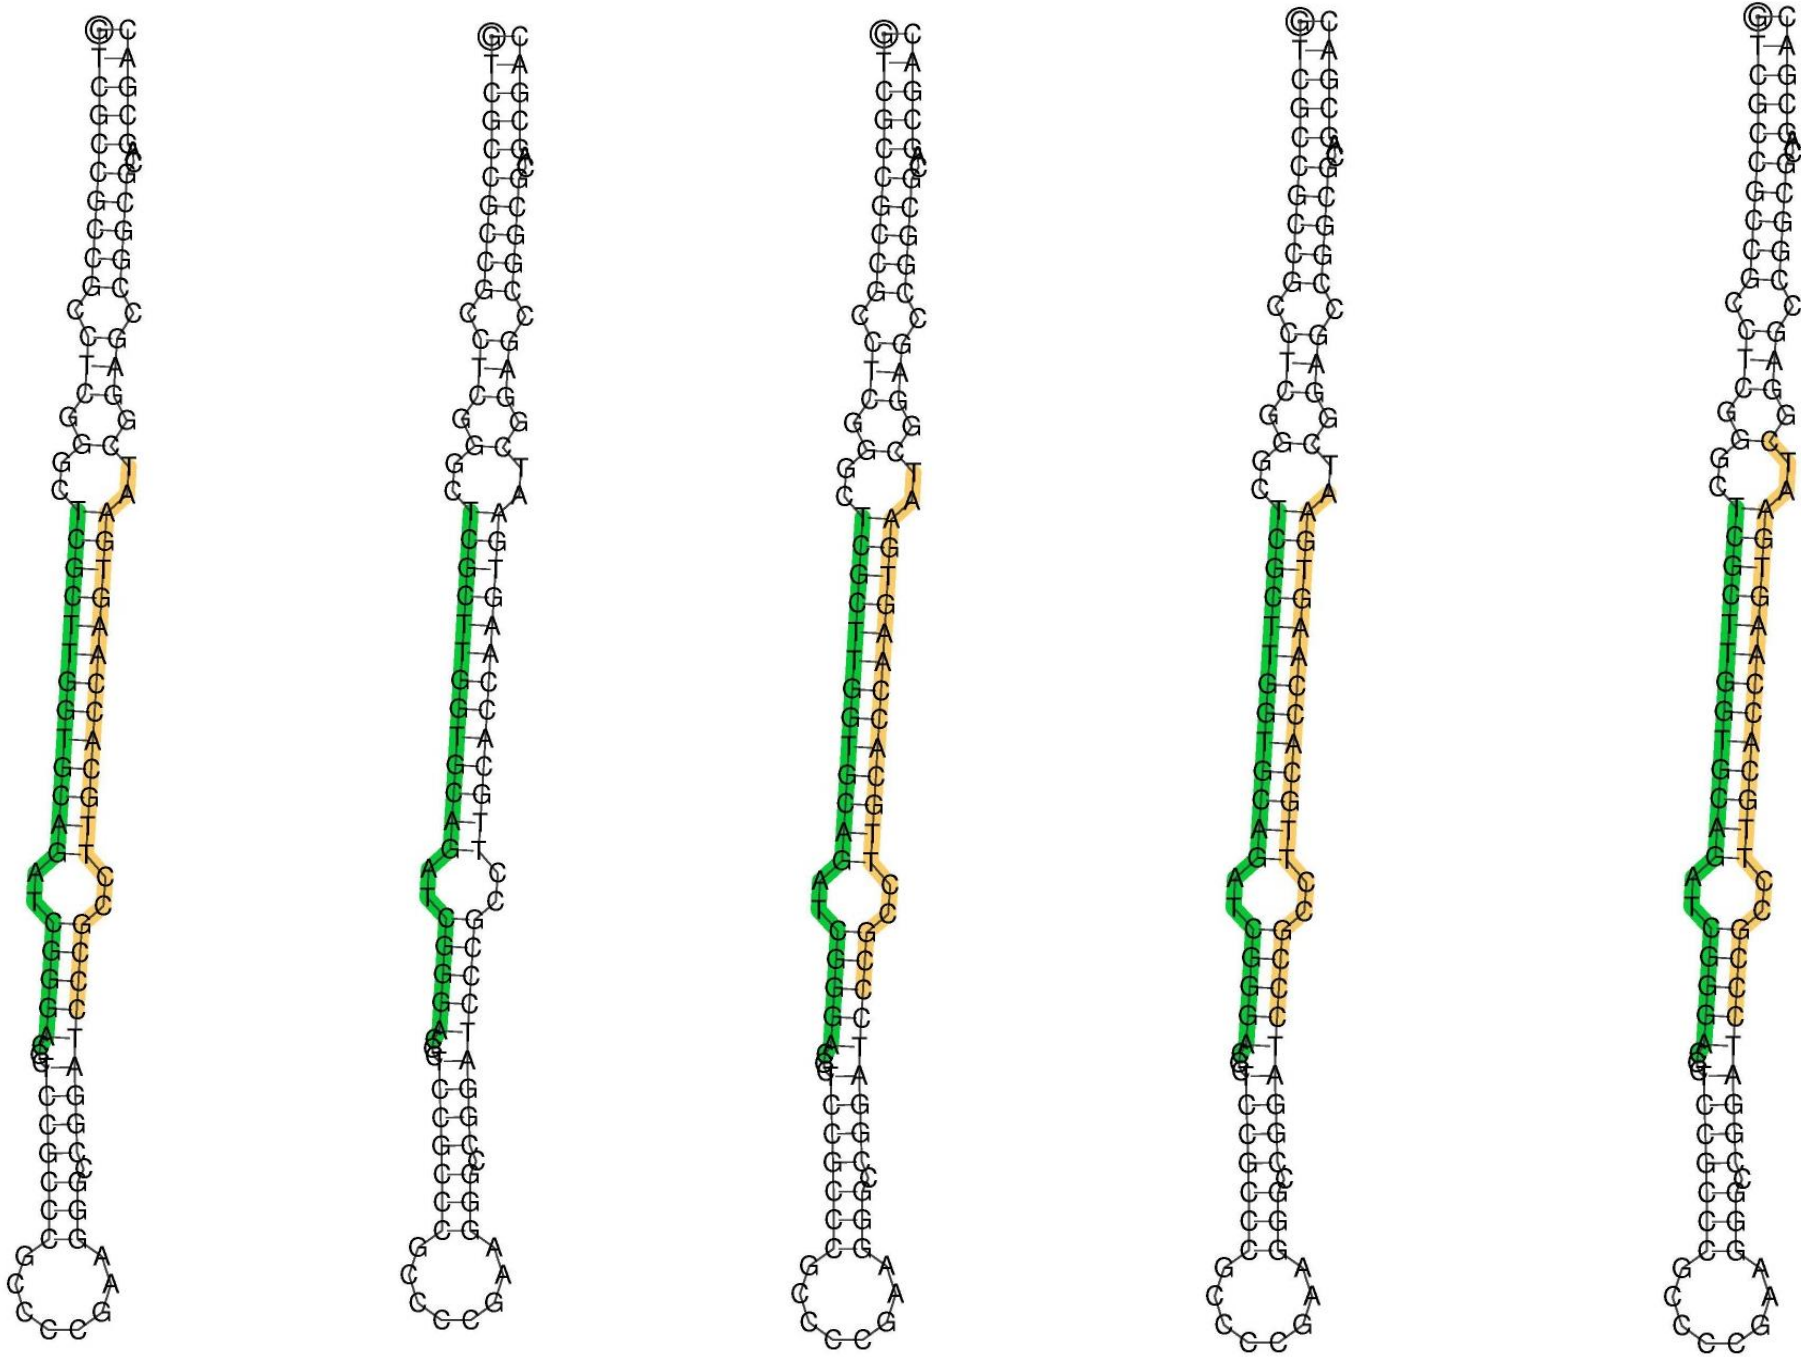

Hvu-new44

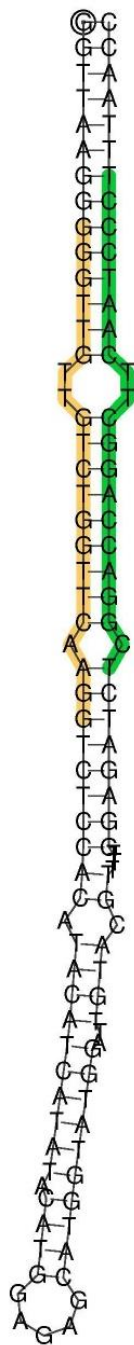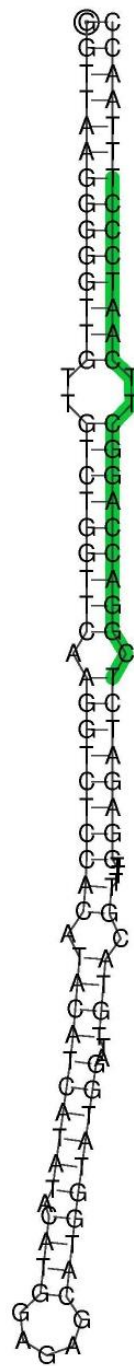

Hvu-new45

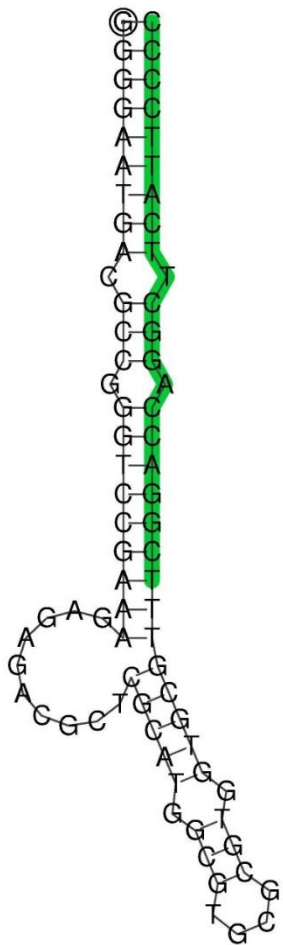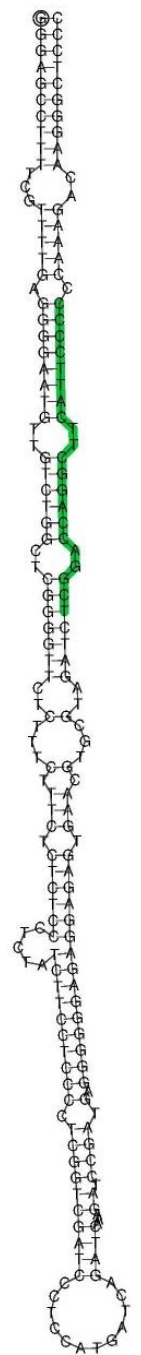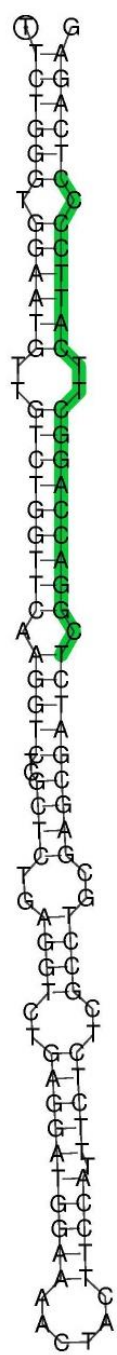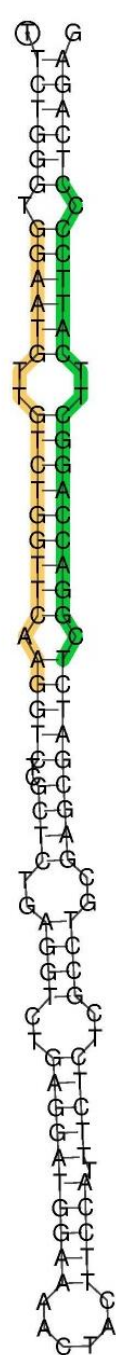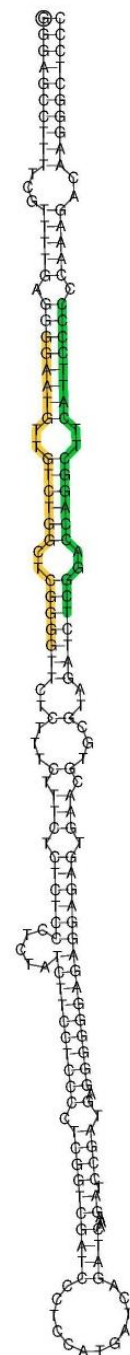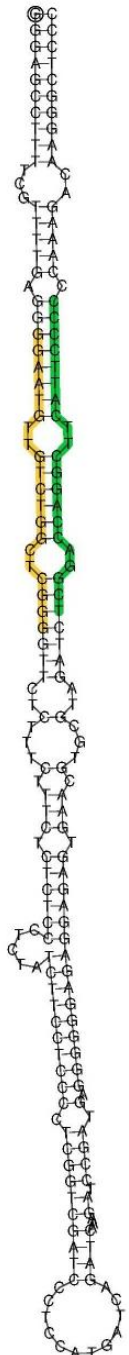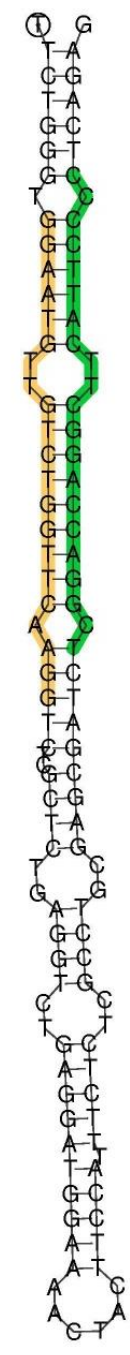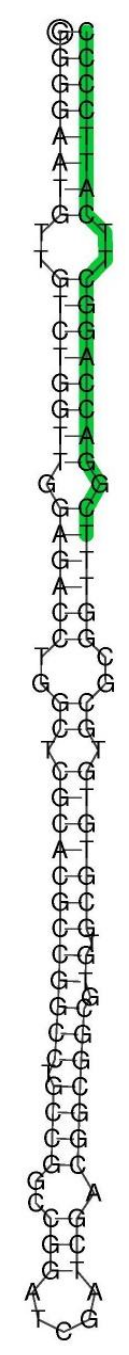

Hvu-new46

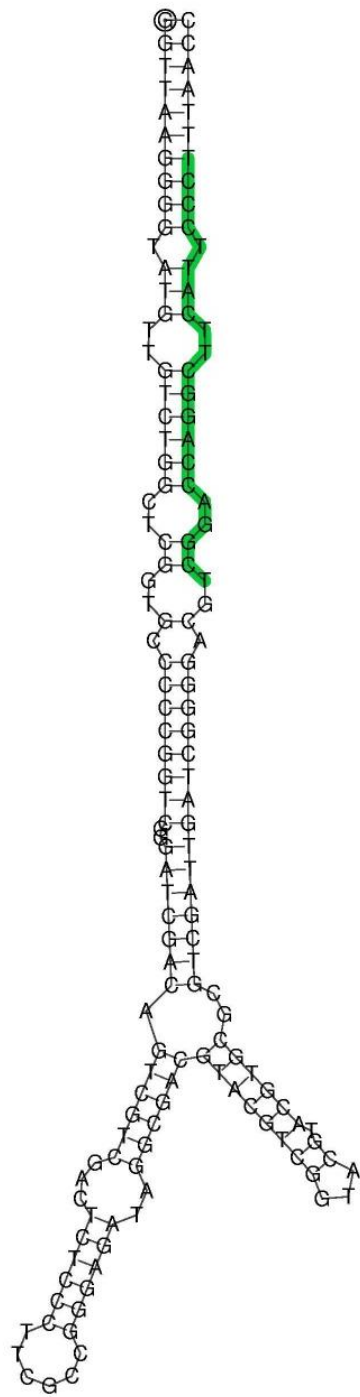

Hvu-new47

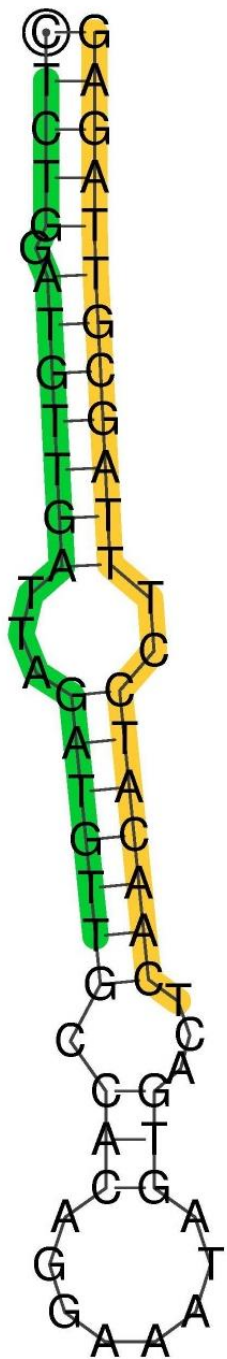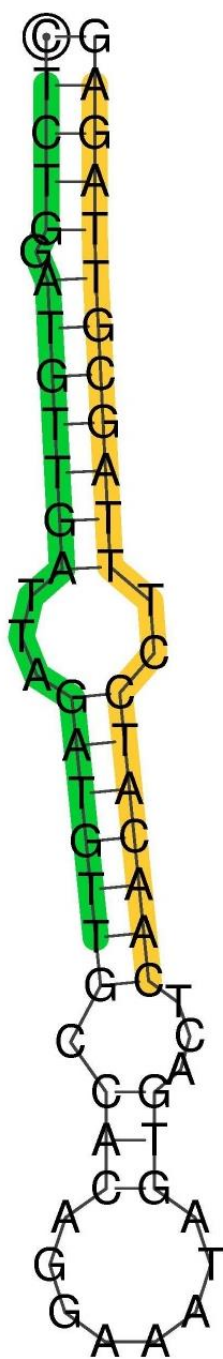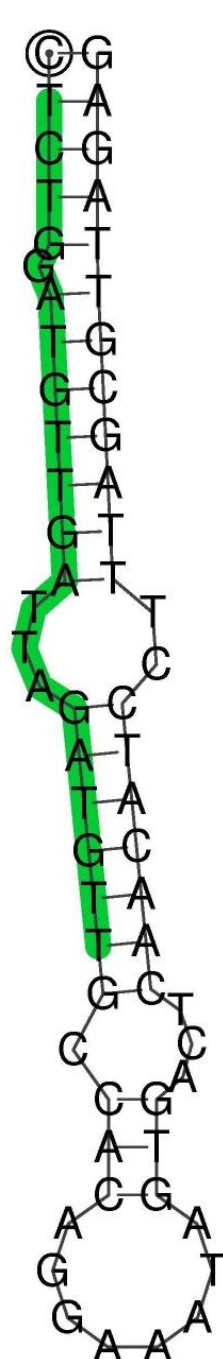



Hvu-new48

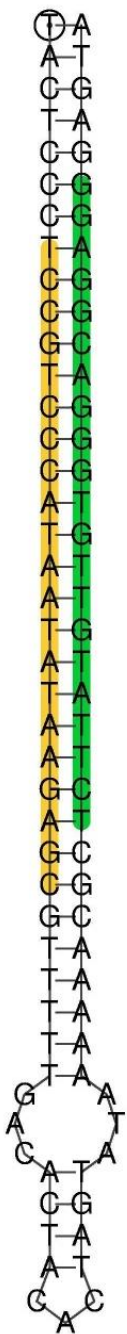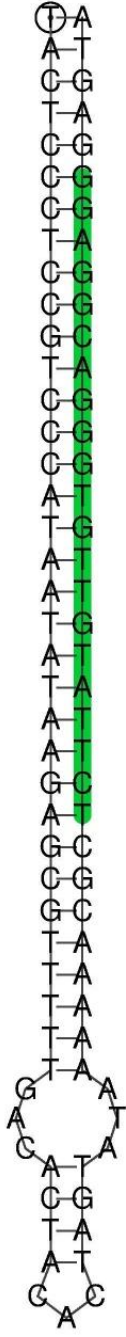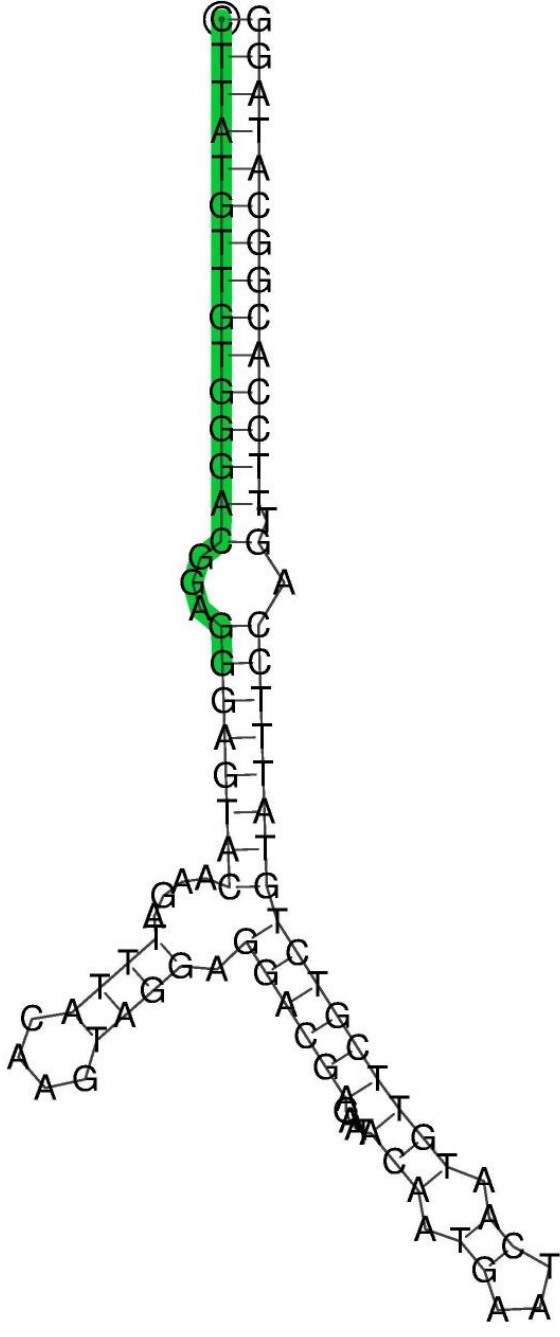

Hvu-new49

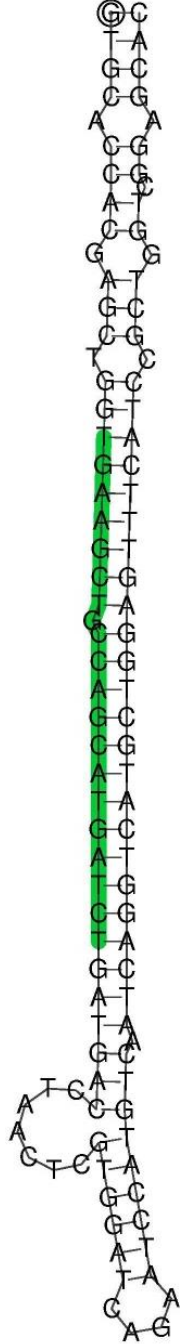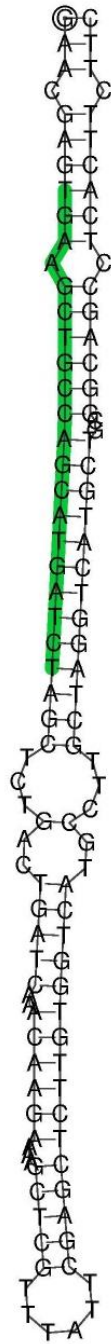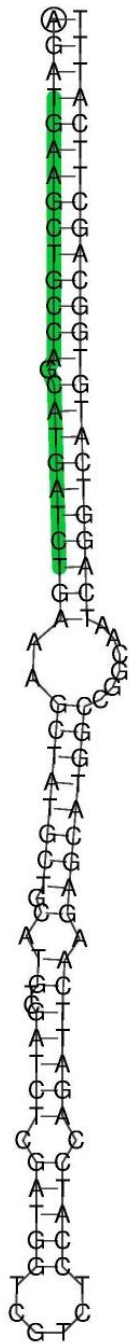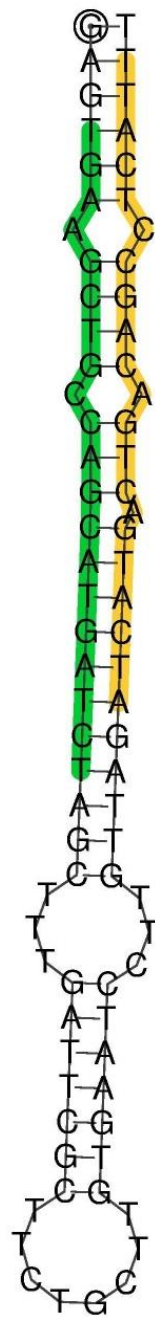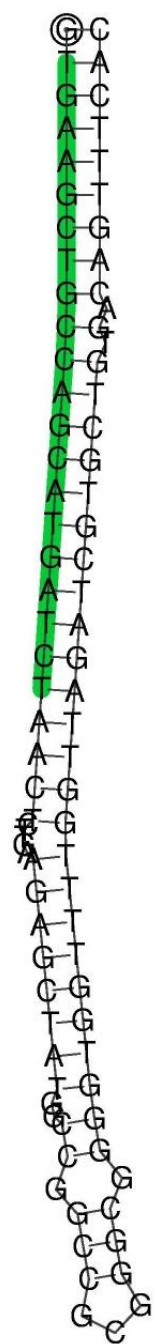

Hvu-new49

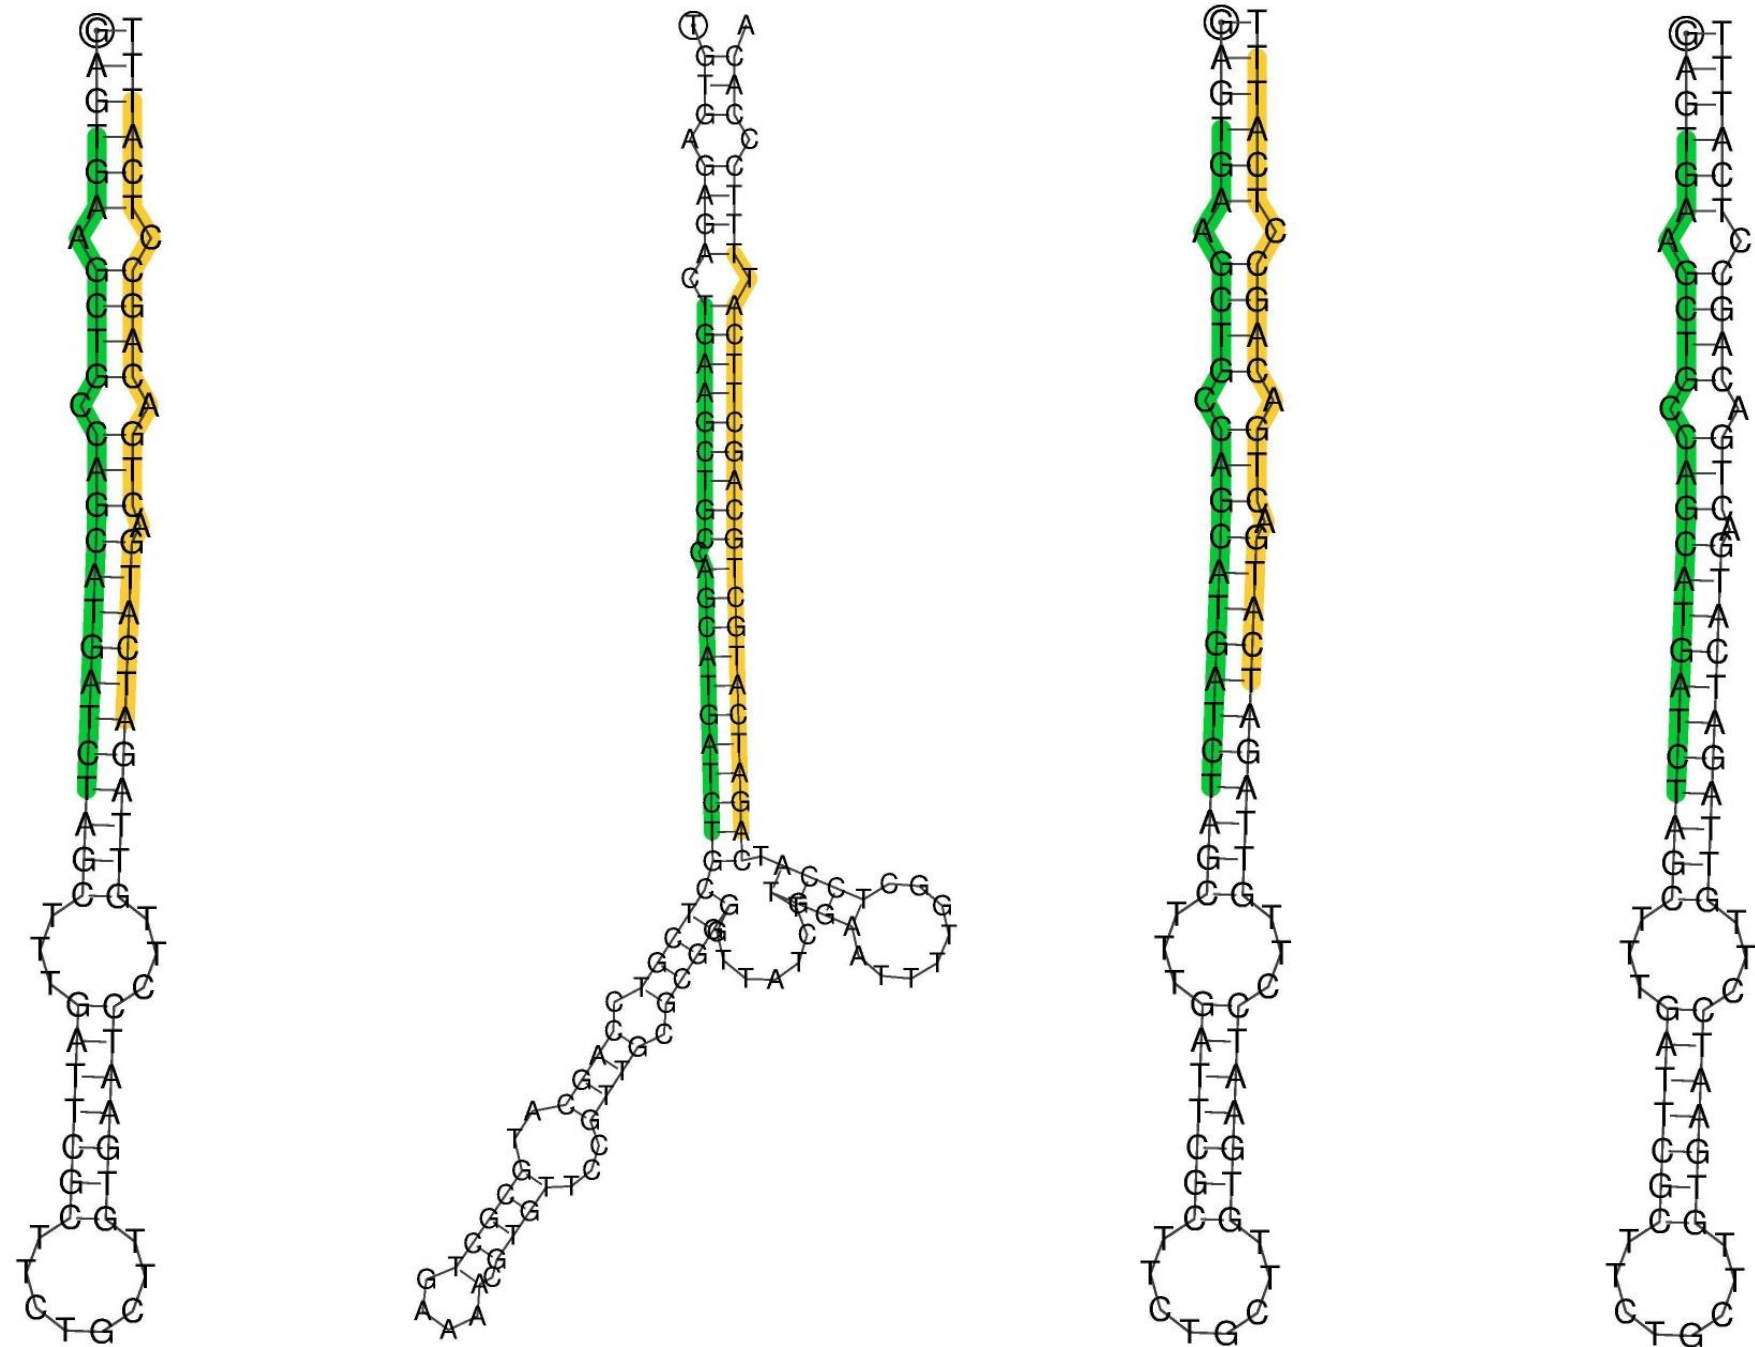

Hvu-new5C

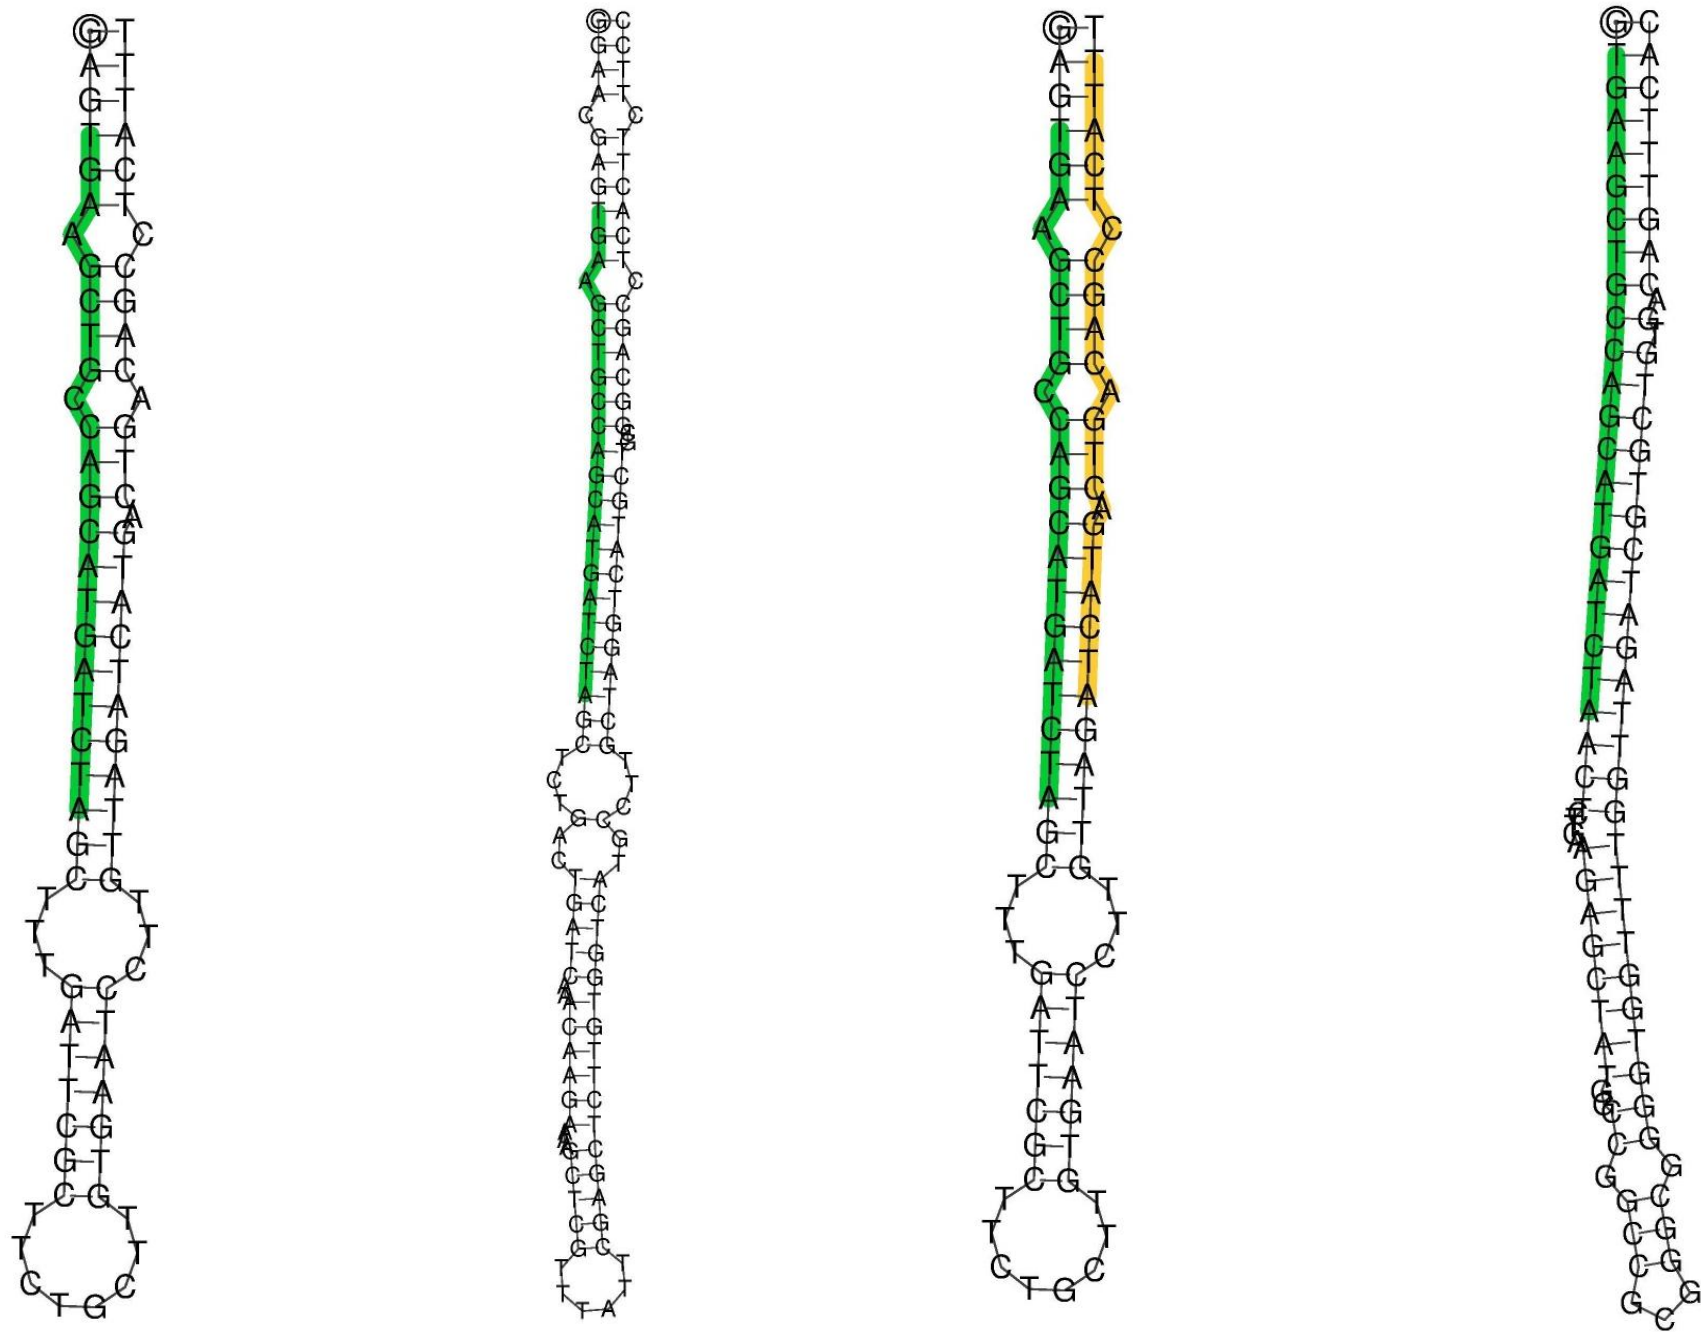

Hvu-new51

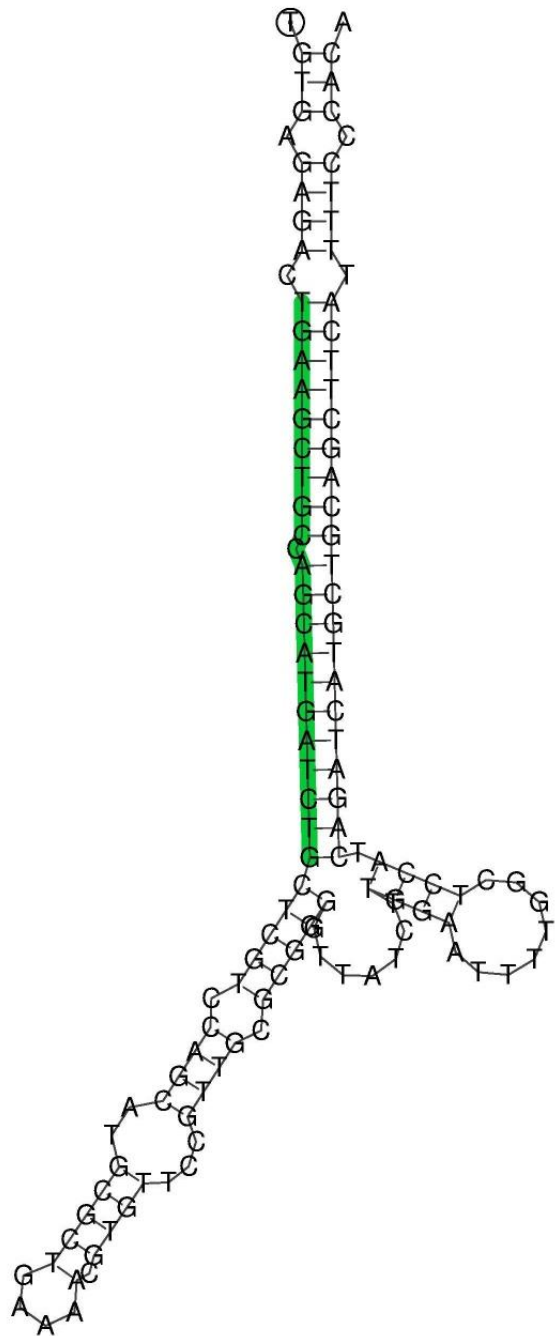

Hvu-new52

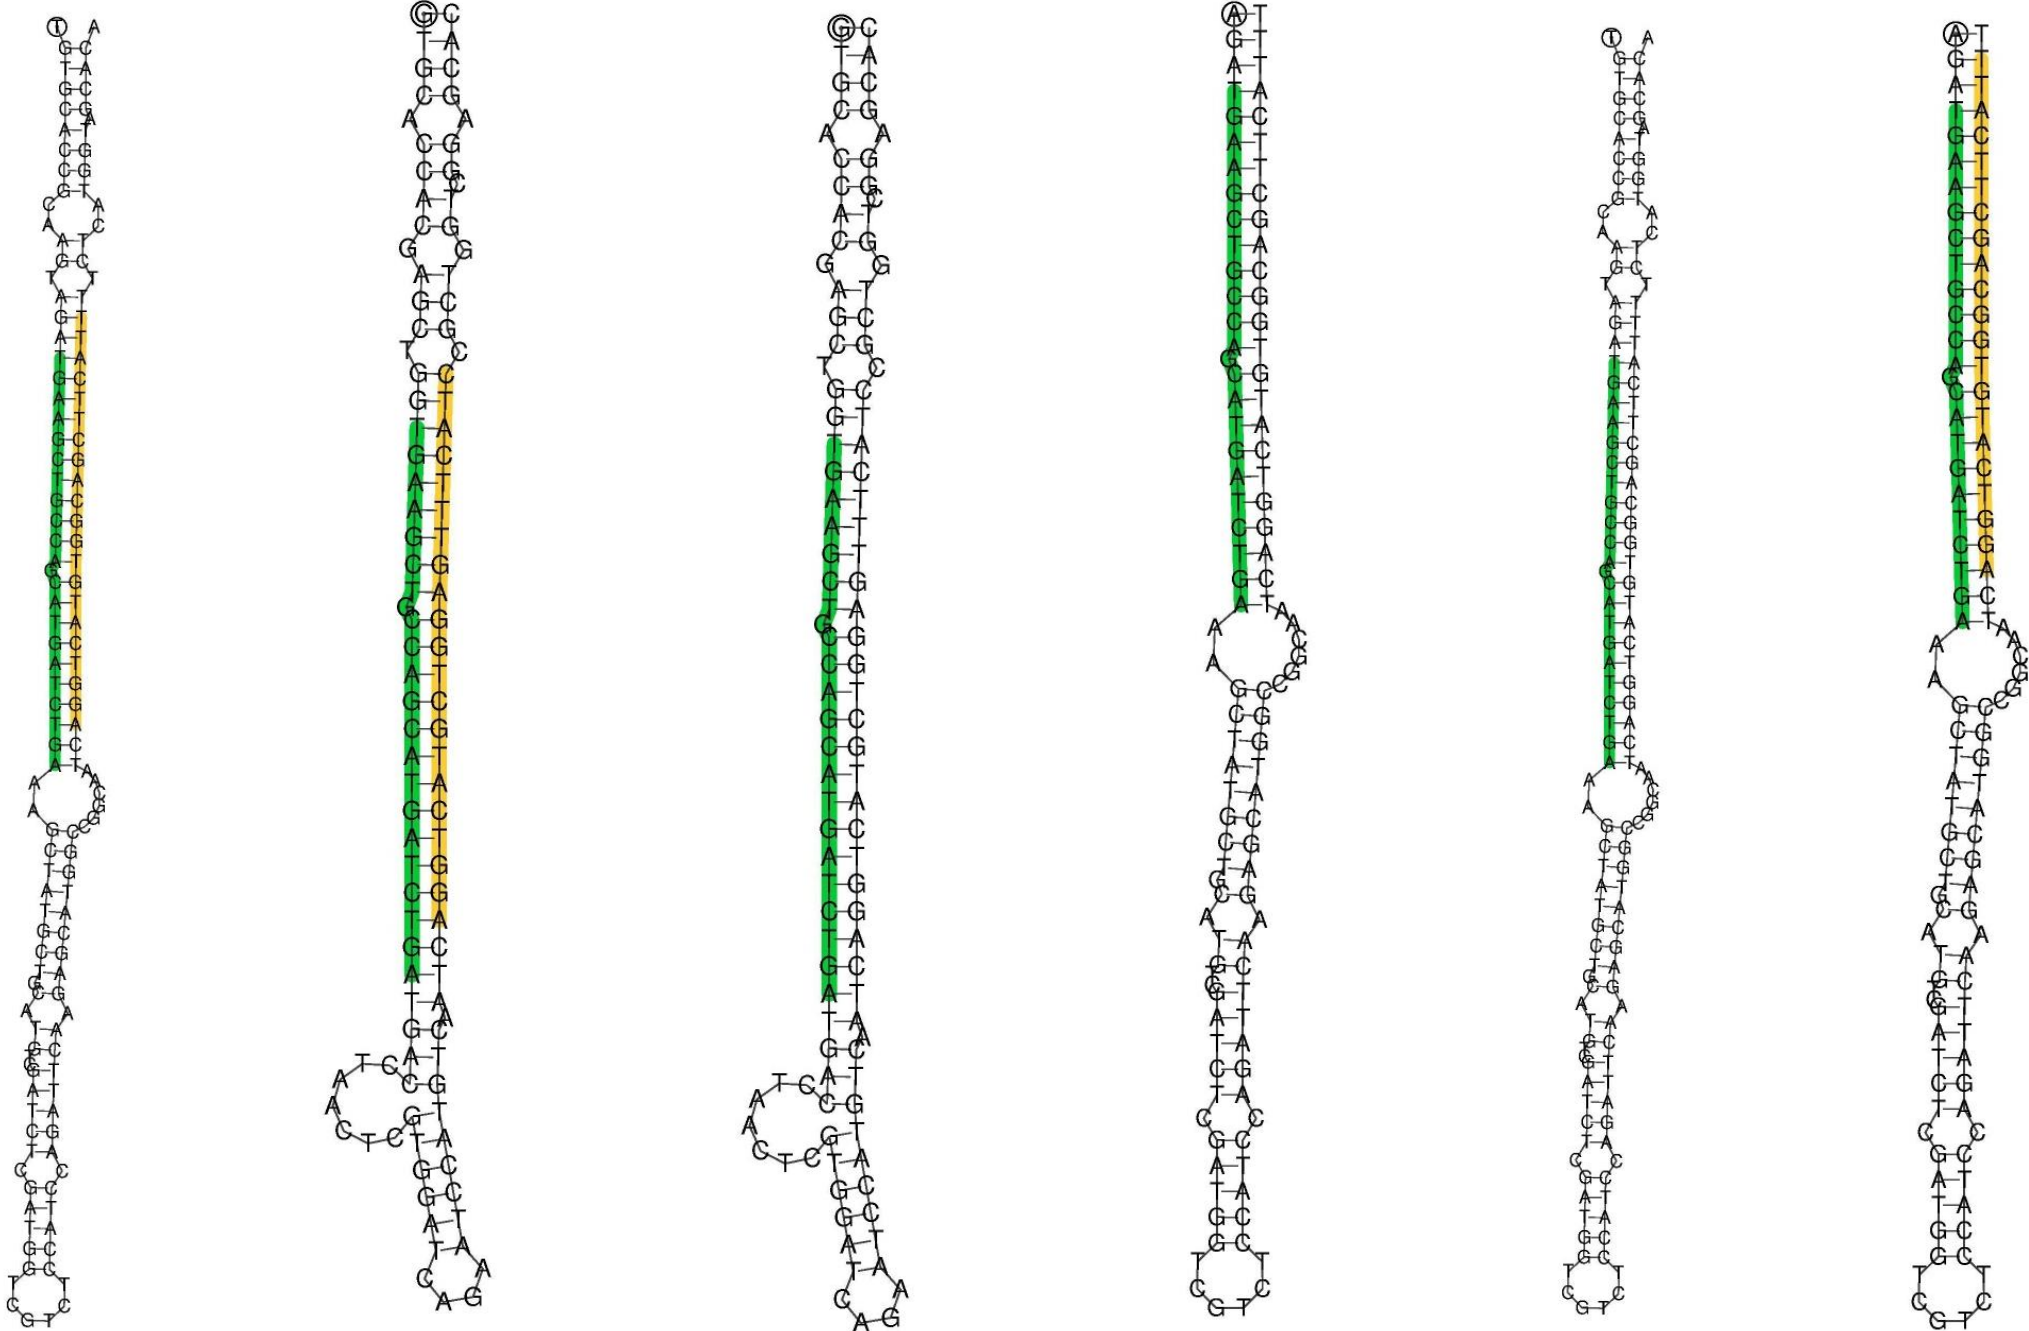

Hvu-new53

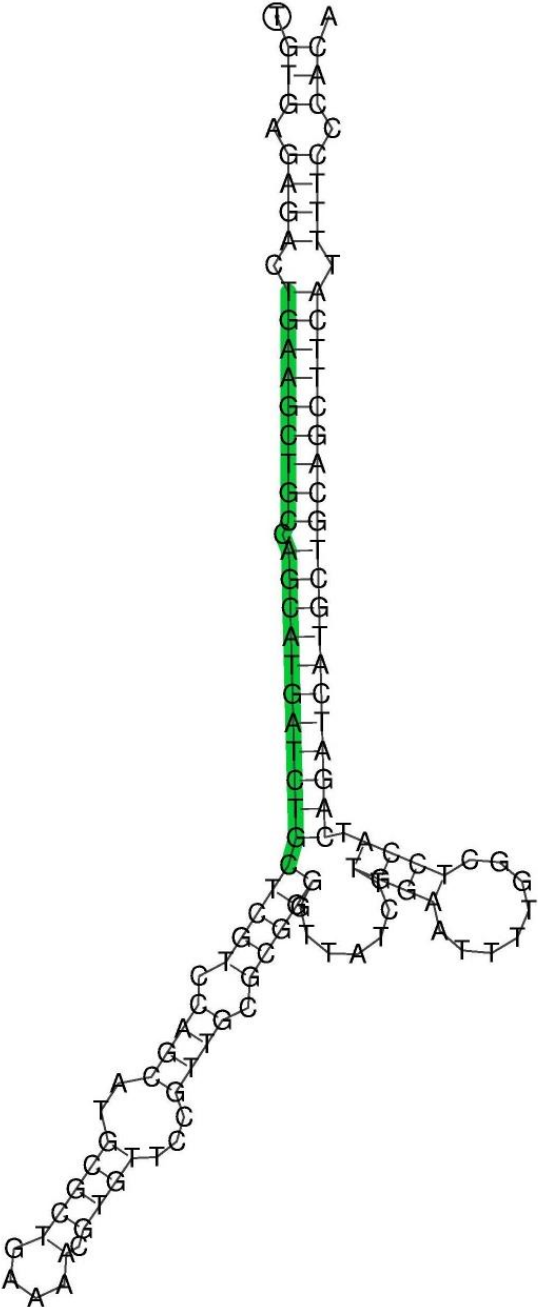



Hvu-new54

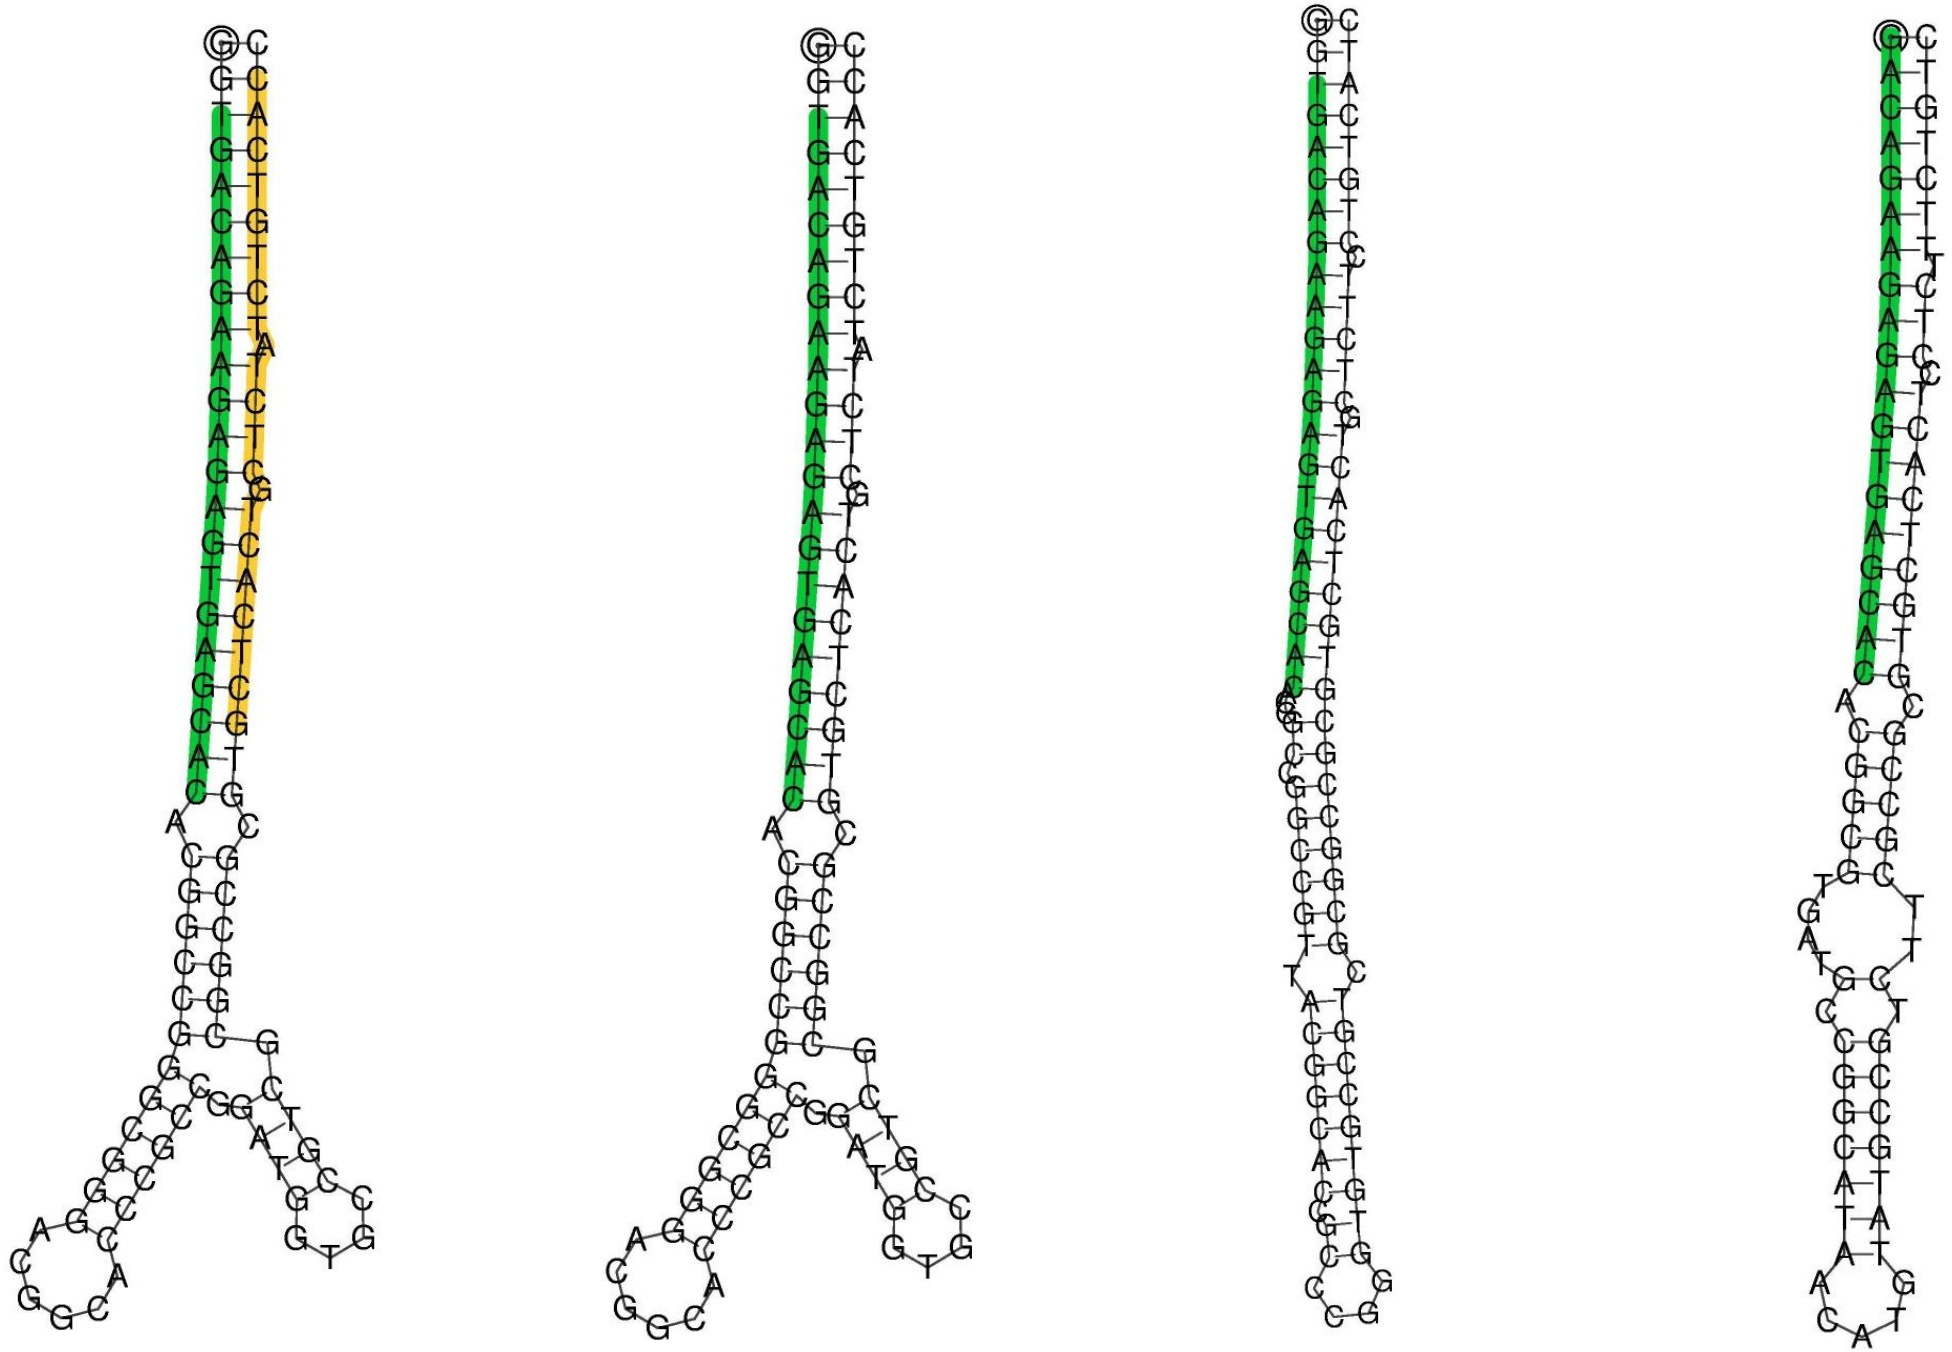



Hvu-new55

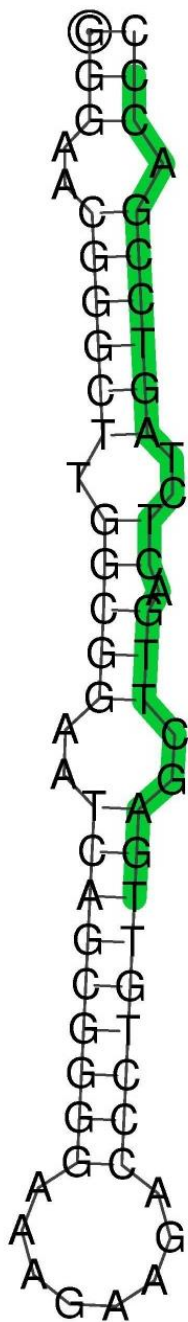

Hvu-new56

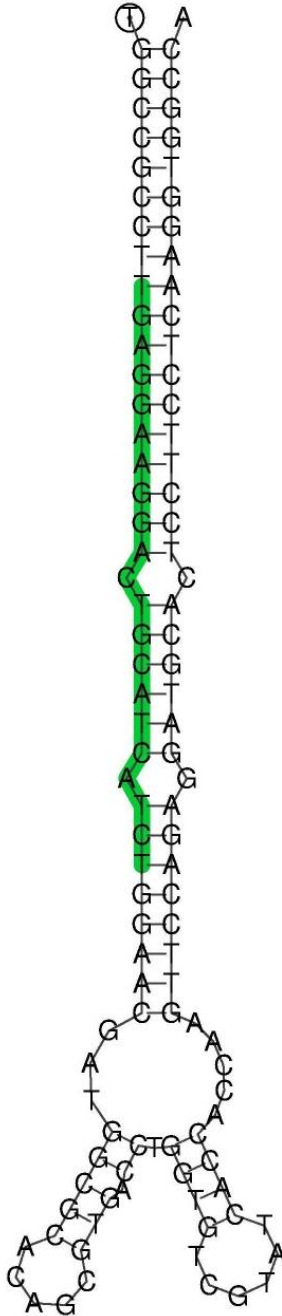

Hvu-new57

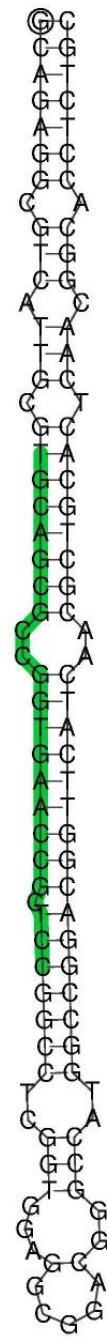

Hvu-new58

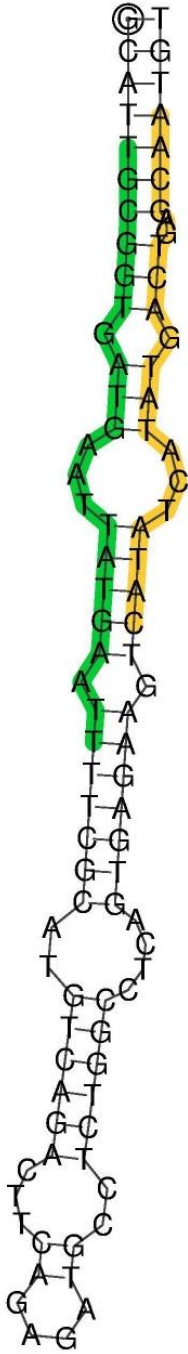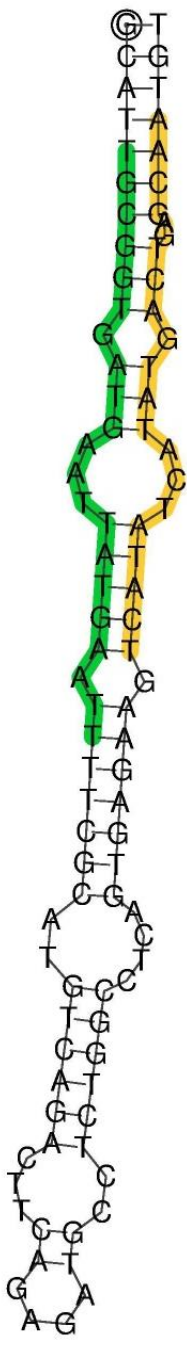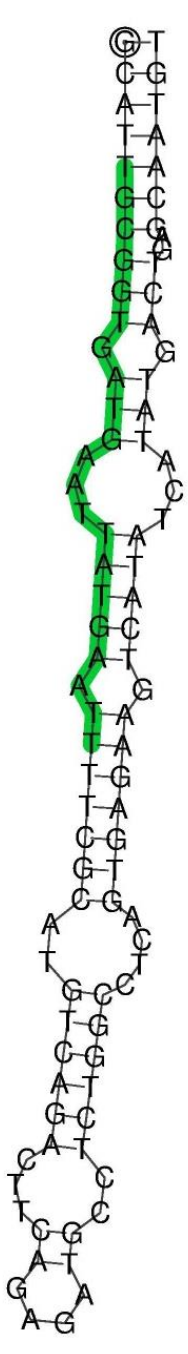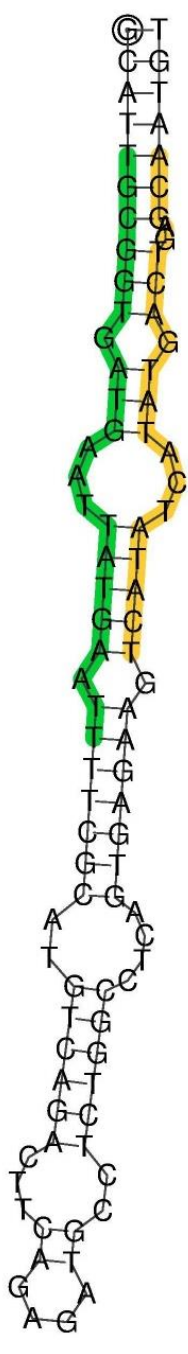

Hvu-new59

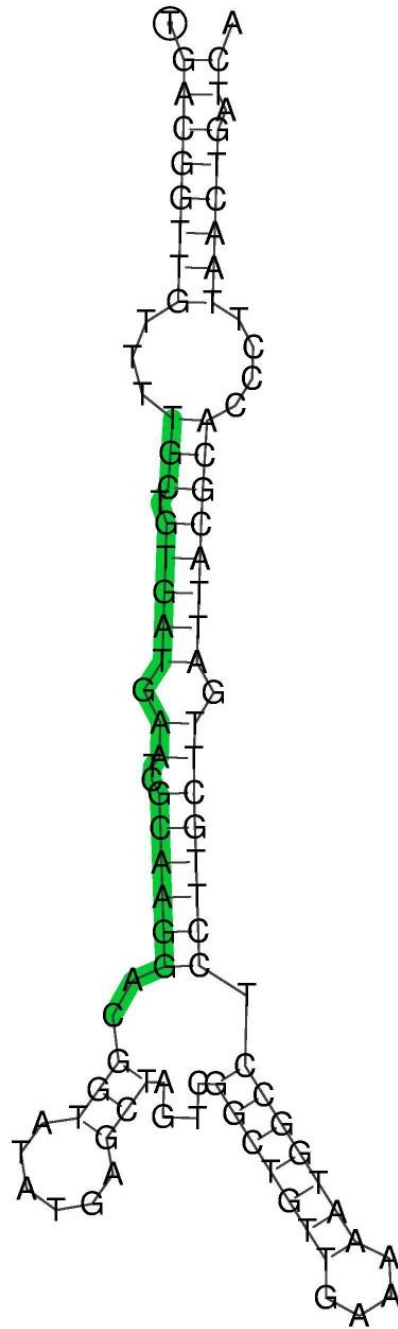

Hvu-new60

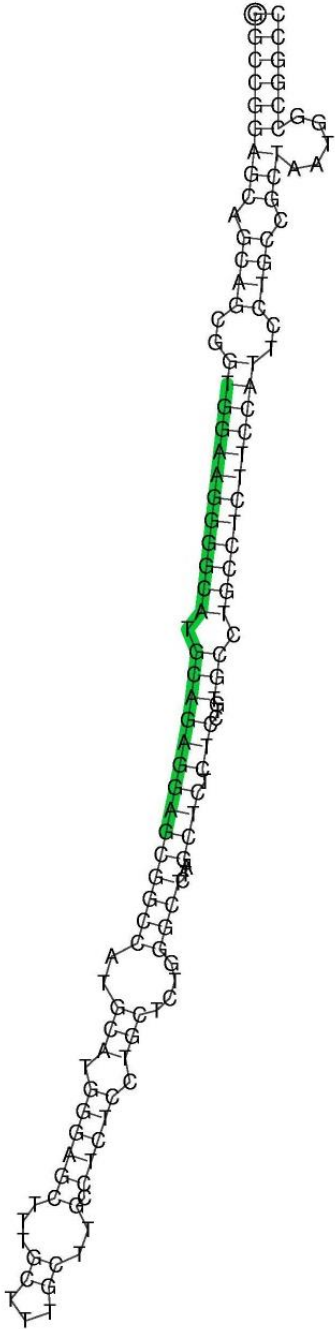

Hvu-new61

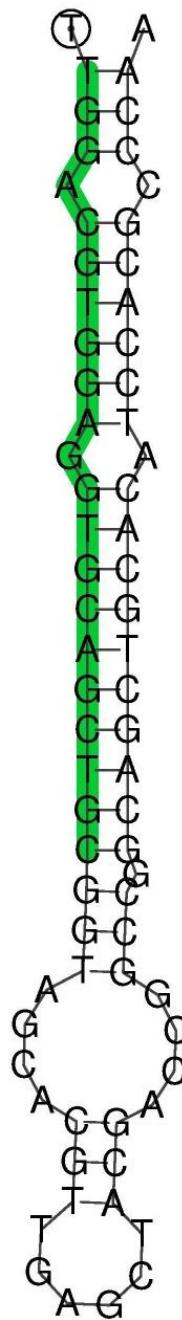

Hvu-new62

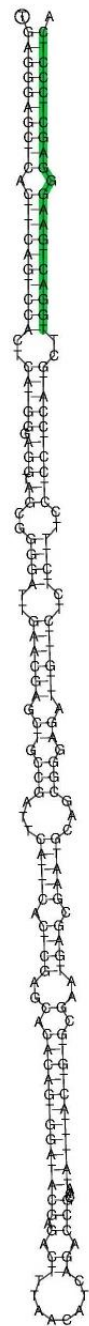



Hvu-new63

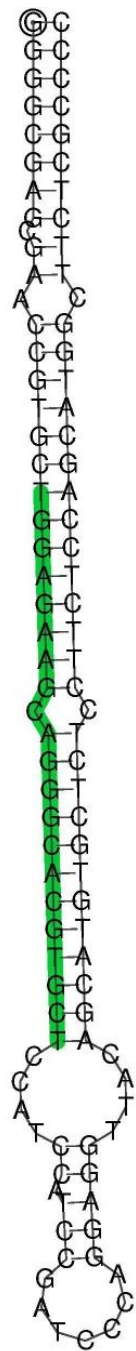

Hvu-new64

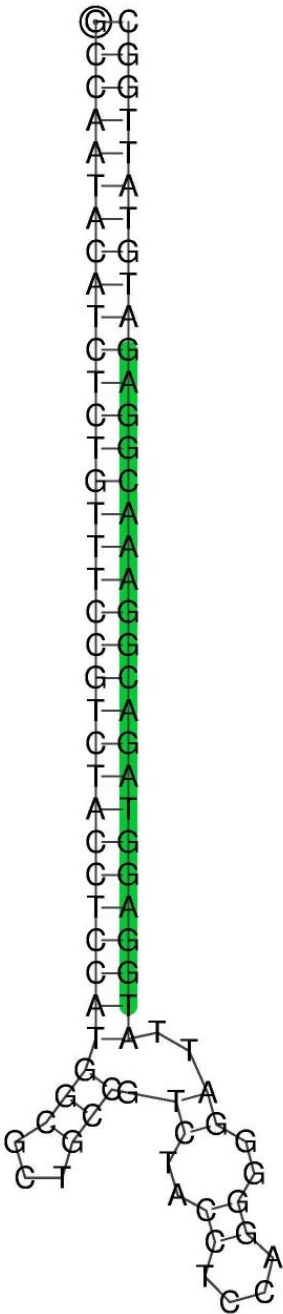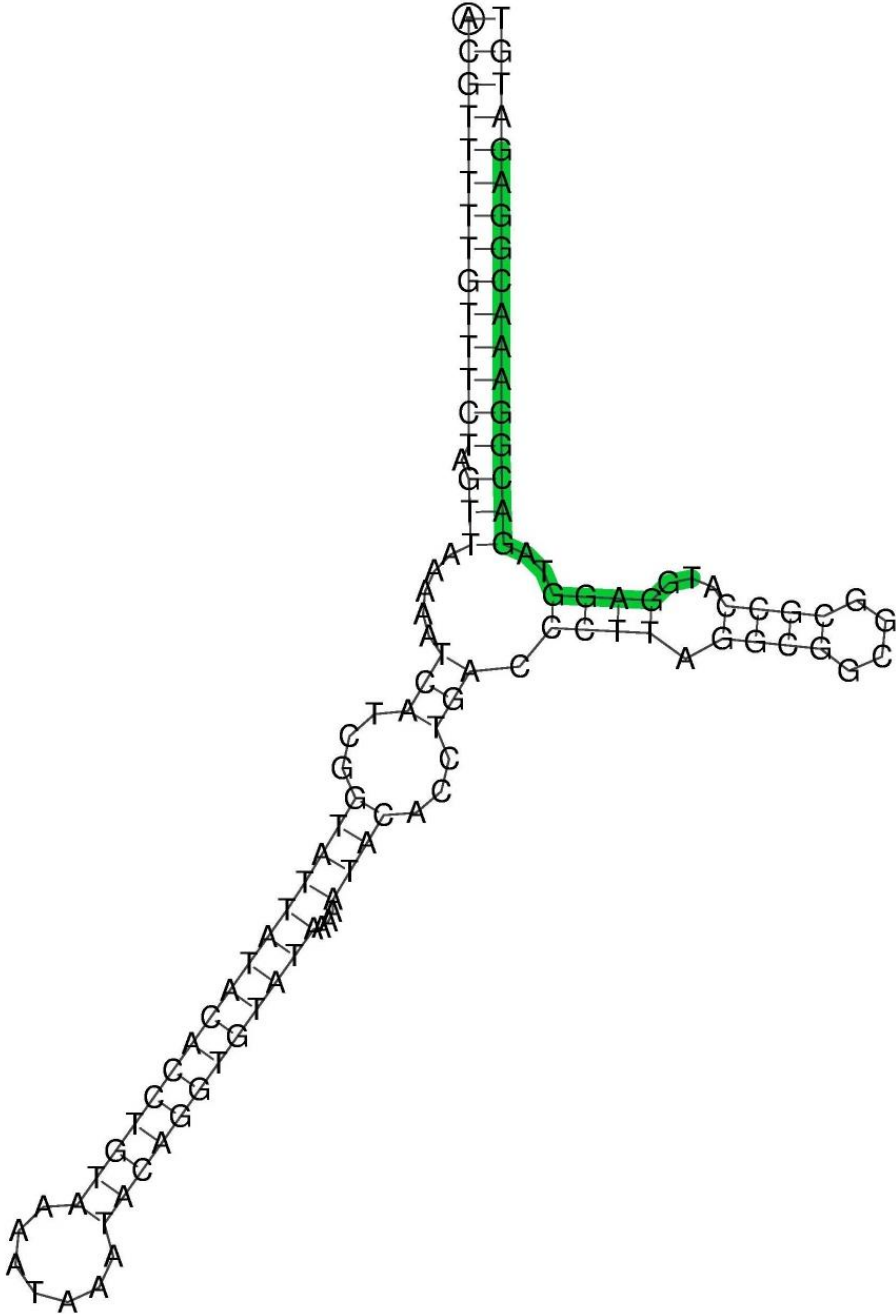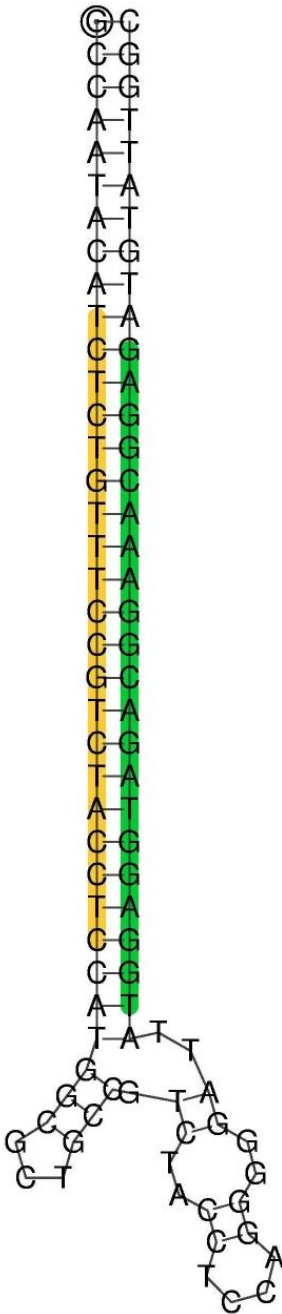

Hvu-new65

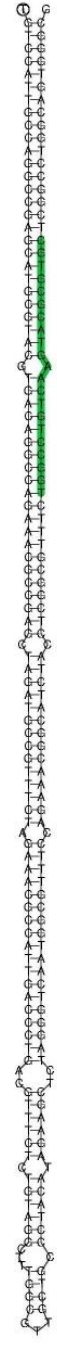

Hvu-new66

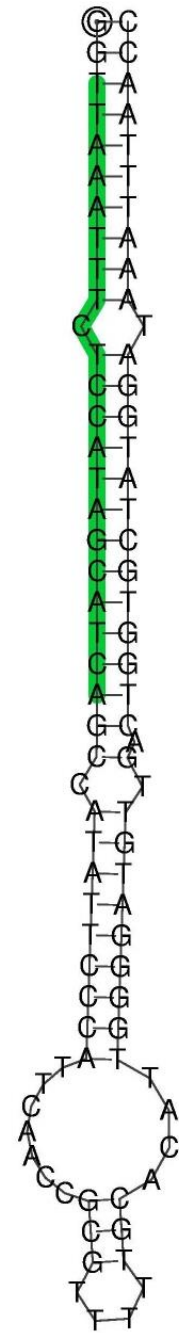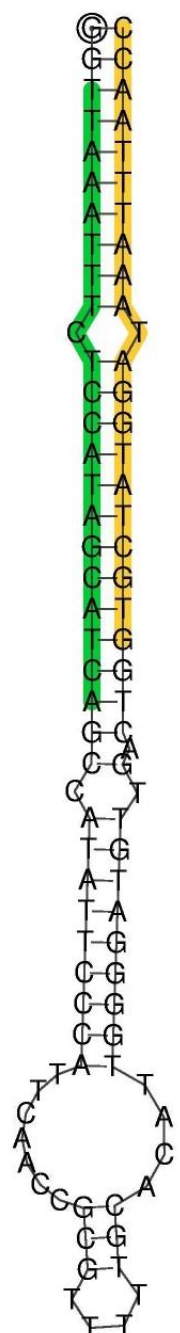

Hvu-new67

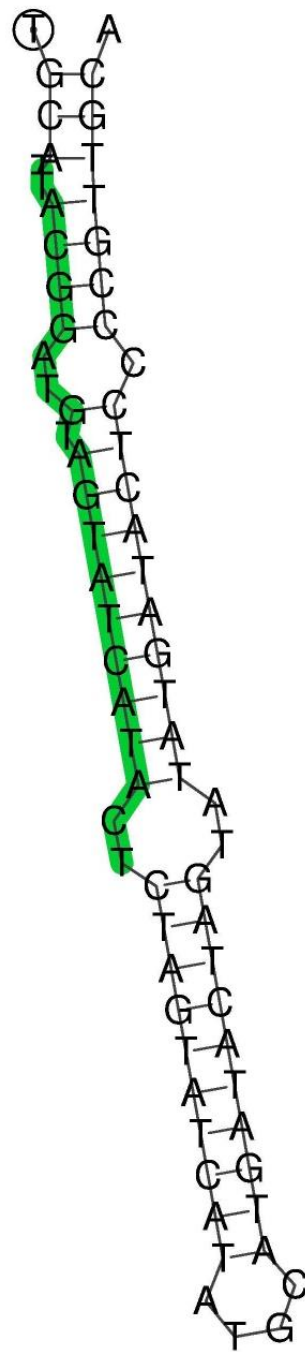

Hvu-new68

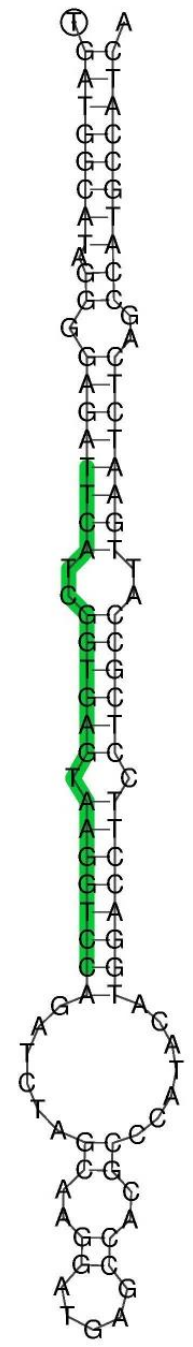

Hvu-new69

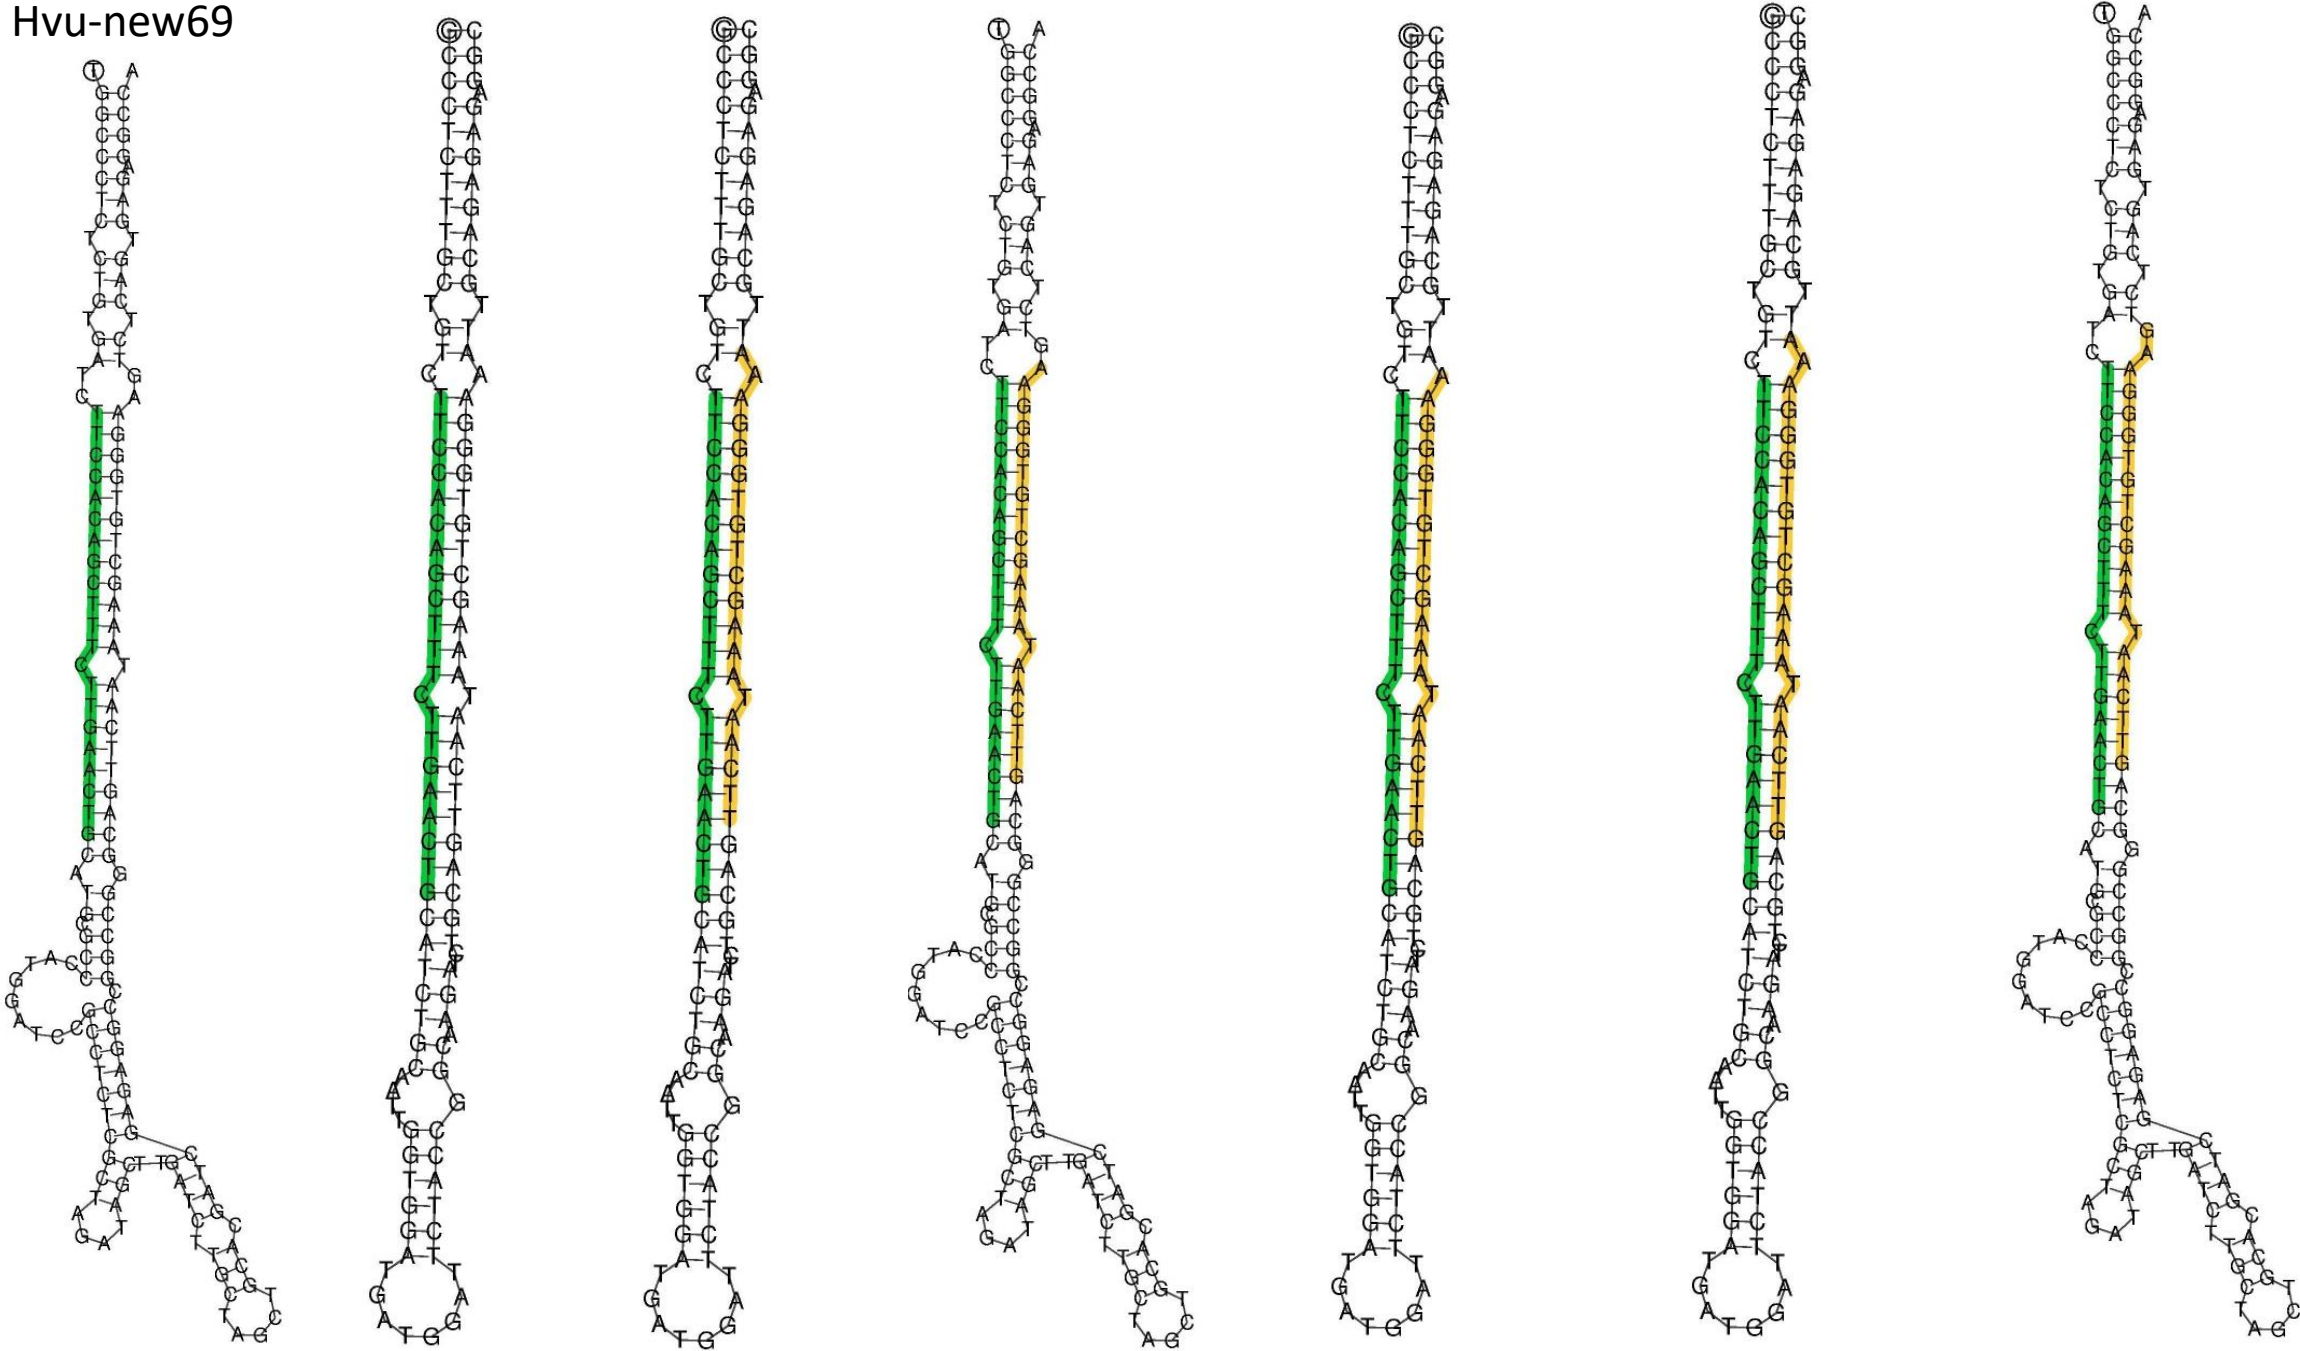

Hvu-new70

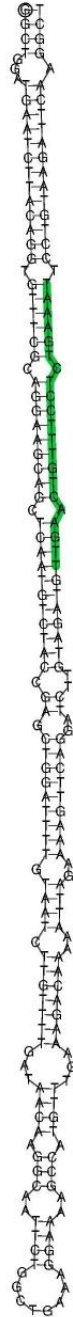



Hvu-new71

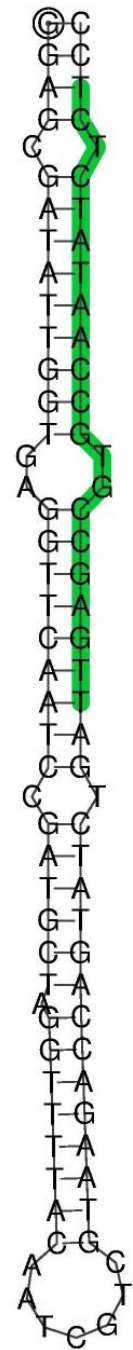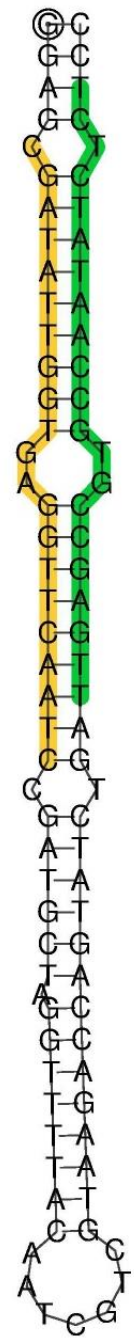

Hvu-new72

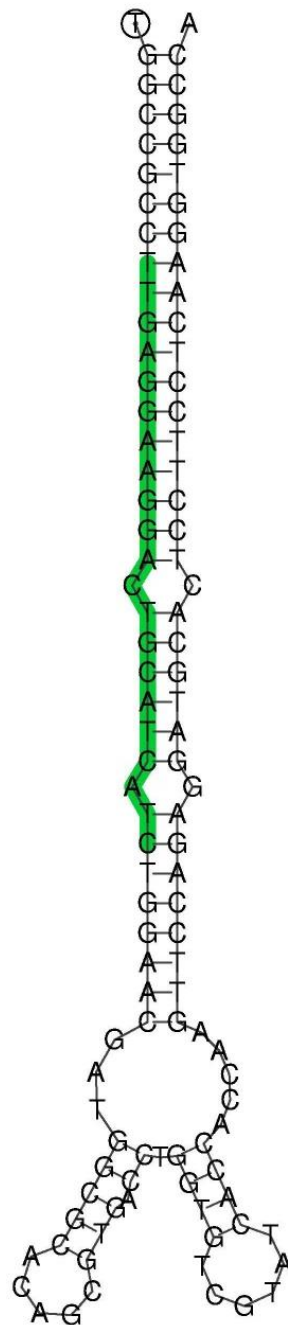

Hvu-new73

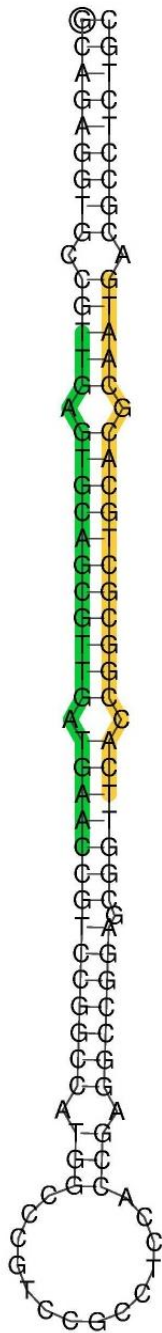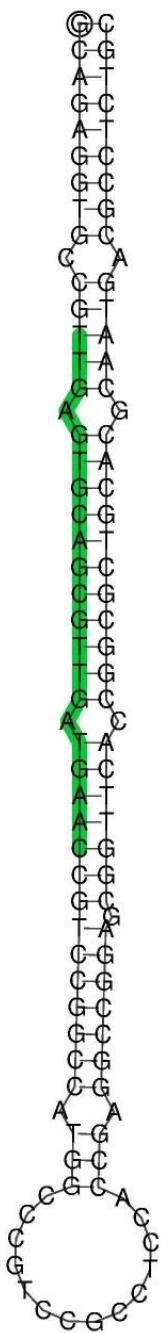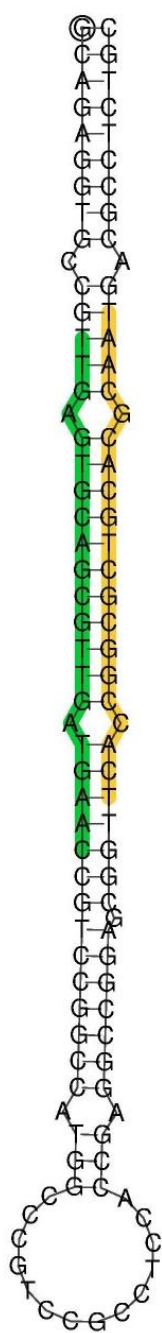



Hvu-new75

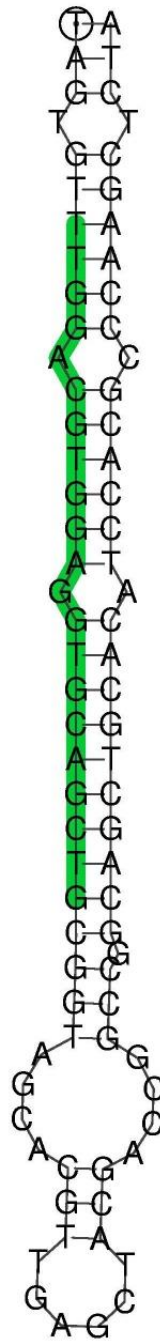

Hvu-new76

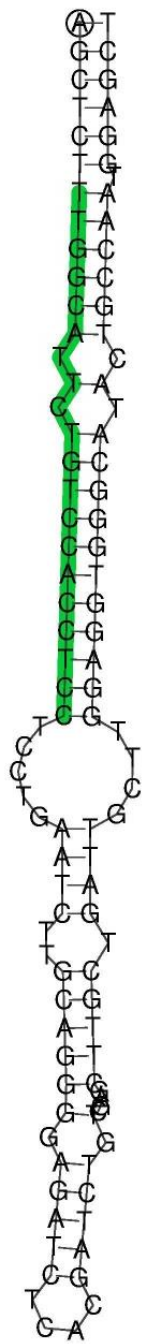

Hvu-new77

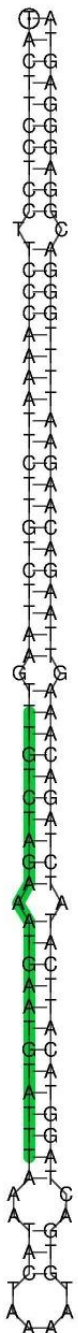

Hvu-new78

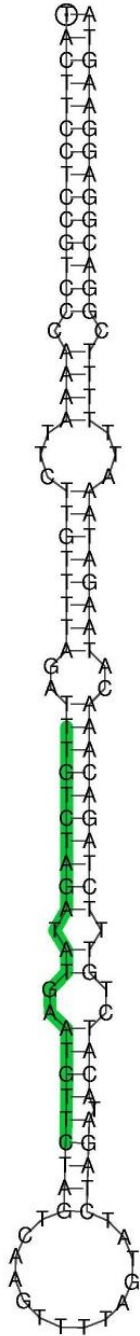



Hvu-new79

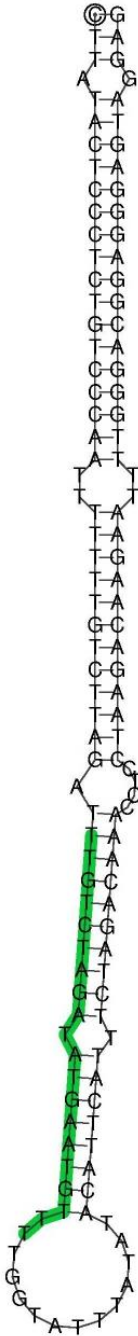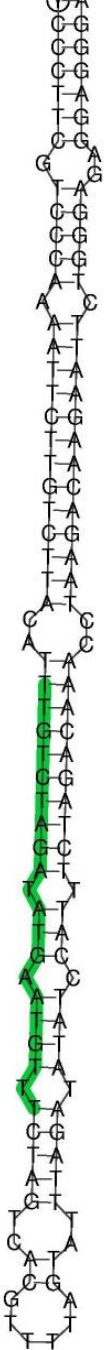

Hvu-new80

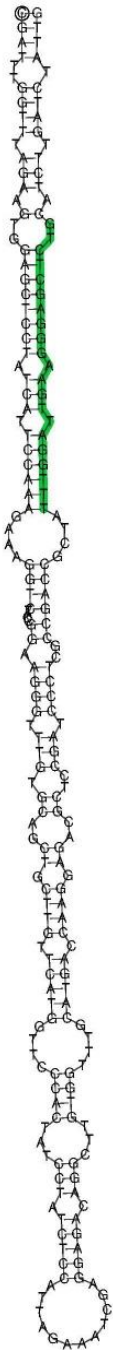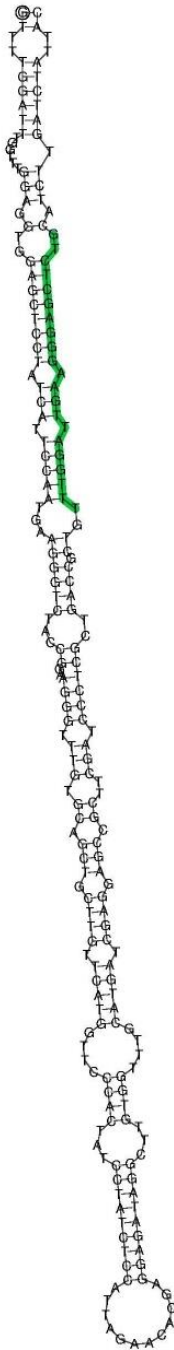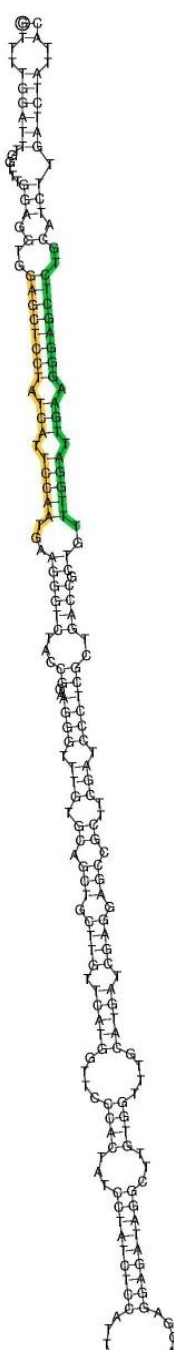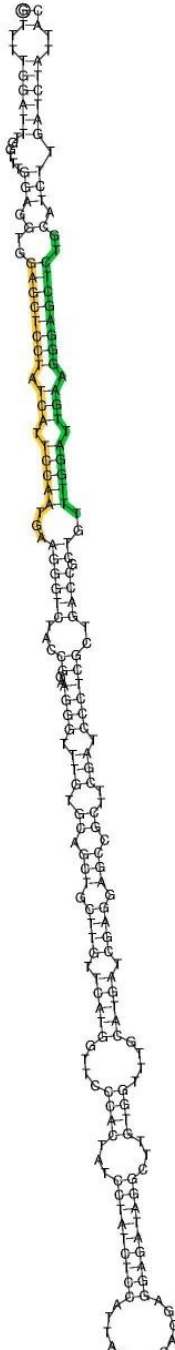

Hvu-new81

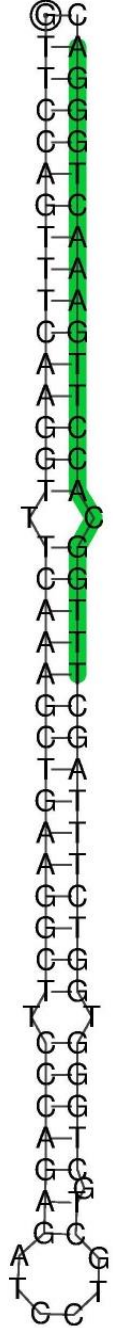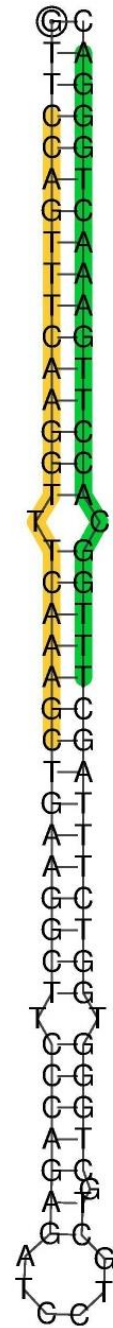

Supplement: s1 [file s1]
