# Supplementary material for: Barley Seeds miRNome Stability during Long-Term Storage and Aging
Source: MDPI journal article supplement (doi:10.3390/ijms22094315), 2021-04-21
Supplement: s1 [file s1]

Table S3. Novel miRNAs identified in the tested seed samples [Rc - renewed seeds; Hv - seeds with high viability; Lv - seeds with low viability]

| Name      | Sequence               | Rc | Lv | Hv |
|-----------|------------------------|----|----|----|
| hvu-new1  | AAGCTCAGGAGGGATAGCGCC  | +  |    | +  |
| hvu-new2  | AAGTCCTCGTGTTCATTCCT   |    | +  | +  |
| hvu-new3  | ACACGCGTGATGTGGTCTCTT  | +  | +  | +  |
| hvu-new4  | ACTGTTGTCGGCCGCGTCGGT  | +  | +  | +  |
| hvu-new5  | AGTCCTCGTGTTCATTCCT    | +  | +  | +  |
| hvu-new6  | AGTGGTGATGAAAATGCTCT   | +  | +  | +  |
| hvu-new7  | ATGCGGGATGAACCGGAAGT   | +  | +  |    |
| hvu-new8  | ATGGAGGTAGACGGAAACGGA  | +  |    |    |
| hvu-new9  | ATGGGACTGAAGTTTACCTCT  | +  | +  |    |
| hvu-new10 | ATGGGACTGAAGTTTACCTCTT | +  | +  | +  |
| hvu-new11 | ATTTGTAGTGTTCGGATTGAGT | +  | +  | +  |
| hvu-new12 | CAGTTCTTCTGTCCACATCG   | +  |    | +  |
| hvu-new13 | CATGACTCTCGGCAACGGATA  | +  | +  | +  |
| hvu-new14 | CCCATGTCGCACGGATTCGA   | +  | +  | +  |
| hvu-new15 | CCTGGGAAGTCCTCGTGTTA   | +  | +  | +  |
| hvu-new16 | CCTGTTTGTCATTAAATTTCTT | +  | +  | +  |
| hvu-new17 | CGAAAGATGGTGAACATATGT  |    | +  | +  |
| hvu-new18 | CGGCAGTGAGGAGAGACAGA   | +  | +  | +  |
| hvu-new19 | CGGGGTGTGGACTGTTGTCA   | +  | +  | +  |
| hvu-new20 | CTCGCGAGCAACGGATGAATC  | +  | +  | +  |
| hvu-new21 | CTGGCAACAAATTAGAGTCTC  |    |    | +  |
| hvu-new22 | CTGGCAACAAATTAGAGTCTCT | +  | +  |    |
| hvu-new23 | CTGTTGAGCTTGACTCTAGTCT | +  | +  | +  |
| hvu-new24 | CTTCCCAACGGGCGGTGGGCTA |    |    | +  |
| hvu-new25 | GACTGTTGTCGGCCGCGTCA   | +  |    | +  |
| hvu-new26 | GAGGGCGGCGATAACATTTTC  | +  | +  | +  |
| hvu-new27 | GCCAGGACTGTAACCATGTGT  | +  |    |    |
| hvu-new28 | GCCGACCTAGCTCAGTGGTA   | +  | +  | +  |
| hvu-new29 | GCGGAACGGCTCTTGCTGGTT  | +  | +  |    |
| hvu-new30 | GGTGTGGACTGTTGTCGGCG   | +  | +  | +  |
| hvu-new31 | GTTGCCGTCGTCGACATGGT   | +  | +  | +  |
| hvu-new32 | TAAGGACTTAAAGTGGGCATT  | +  |    |    |
| hvu-new33 | TAATAAGCATGTCTTCAGATG  | +  | +  | +  |
| hvu-new34 | TAATGATCTTATCTCGGTGTTG | +  |    |    |
| hvu-new35 | TATAAGTCTTTGTAGAGATC   | +  |    | +  |
| hvu-new36 | TATTGGCTCGGCTCACTCAGG  | +  | +  | +  |
| hvu-new37 | TCAAGTGATGAGGAATAAACT  | +  | +  | +  |
| hvu-new38 | TCAGACTTCGCTGGGACATC   | +  | +  | +  |

|           |                        |   |   |   |
|-----------|------------------------|---|---|---|
| hvu-new39 | TCAGTGCGATCCCTCTGGAAT  | + | + | + |
| hvu-new40 | TCCACAGGCTTTCTTGAAGT   | + | + | + |
| hvu-new41 | TCCCAACGGGCGGTGGGCTA   | + | + |   |
| hvu-new42 | TCCGTTGTAGTCTAGGTGGTT  | + | + | + |
| hvu-new43 | TCGCTTGGTGCAGATCGGGAC  | + | + | + |
| hvu-new44 | TCGGACCAGGCTTCAATCCCT  | + | + | + |
| hvu-new45 | TCGGACCAGGCTTCATTCCCC  | + | + | + |
| hvu-new46 | TCGGACCAGGCTTCATTCCCT  | + | + | + |
| hvu-new47 | TCTGGATGTTGATTAGATGTT  | + |   | + |
| hvu-new48 | TCTTATGTTGTGGGACGGAGG  | + |   | + |
| hvu-new49 | TGAAGCTGCCAGCATGATCT   | + |   | + |
| hvu-new50 | TGAAGCTGCCAGCATGATCTA  | + | + | + |
| hvu-new51 | TGAAGCTGCCAGCATGATCTG  | + | + | + |
| hvu-new52 | TGAAGCTGCCAGCATGATCTGA | + | + | + |
| hvu-new53 | TGAAGCTGCCAGCATGATCTGC |   | + | + |
| hvu-new54 | TGACAGAAGAGAGTGAGCAC   | + | + | + |
| hvu-new55 | TGAGCTTGACTCTAGTCCGACC | + | + | + |
| hvu-new56 | TGAGGAAGGACTGCATCATCT  | + | + | + |
| hvu-new57 | TGCAGCGCCGGTGAACCGCTCC |   | + | + |
| hvu-new58 | TGCGGTGATGAATTATGAATT  | + | + | + |
| hvu-new59 | TGCTGTGATGAATCGCAAGGAC | + | + | + |
| hvu-new60 | TGGAAGGGGCATGCAGAGGAG  | + |   |   |
| hvu-new61 | TGGACGTGGAGGTGCAGCTGC  | + |   |   |
| hvu-new62 | TGGACTGAAGGGAGCTCCCTC  | + | + | + |
| hvu-new63 | TGGAGAAGCAGGGCACGTGCT  |   | + | + |
| hvu-new64 | TGGAGGTAGACGGAAACGGAG  | + |   | + |
| hvu-new65 | TGGCCTGTCAAGTACGCGTGC  | + |   |   |
| hvu-new66 | TTAAATTTCTCCATAGCATCA  | + | + | + |
| hvu-new67 | TTACGGATGTAGTATCATACT  | + |   | + |
| hvu-new68 | TTCATCGGTGAGTAAGGTCC   | + |   | + |
| hvu-new69 | TTCCACAGCTTTCTTGAAGT   | + | + | + |
| hvu-new70 | TTGAACTGTTTCCTCTGAAAT  | + | + | + |
| hvu-new71 | TTGAGCCGTGCCAATATCTCT  | + | + | + |
| hvu-new72 | TTGAGGAAGGACTGCATCATC  | + |   |   |
| hvu-new73 | TTGAGTGCAGCGTTGATGAAC  | + |   |   |
| hvu-new74 | TTGATTTGCGGGCTCATCTTGC | + | + | + |
| hvu-new75 | TTGGACGTGGAGGTGCAGCTG  | + | + | + |
| hvu-new76 | TTGGCATTCTGTCCACCTCC   | + | + | + |
| hvu-new77 | TTGTCTAGAAATGAATGTATTT | + | + |   |
| hvu-new78 | TTGTCTAGATATGAATGTTC   | + | + |   |
| hvu-new79 | TTGTCTAGATATGAATGTTT   | + | + | + |

|                  |                       |   |   |   |
|------------------|-----------------------|---|---|---|
| <b>hvu-new80</b> | TTTGGATTGAAGGGAGCTCTG | + | + | + |
| <b>hvu-new81</b> | TTTGGCACCTTGAAACTGGGA | + | + | + |
