# Supplementary material for: Barley Seeds miRNome Stability during Long-Term Storage and Aging
Source: MDPI journal article supplement (doi:10.3390/ijms22094315), 2021-04-21
Supplement: s1 [file s1]

**Table S2.** An average level of expression of known miRNAs identified in the tested seed samples [Rc - renewed seeds; Hv - seeds with high viability; Lv - seeds with low viability]

| miRNA          | sequence              | averaged level of expression<br>[RPM] |          |          |
|----------------|-----------------------|---------------------------------------|----------|----------|
|                |                       | Rc                                    | Lv       | Hv       |
| miR1120 family |                       | 22.45                                 | 45.07    | 59.43    |
| miR1120.1      | TTCTTATATTATGGGACGG   | 0                                     | 15.5     | 0        |
| miR1120.2      | TTCTTATATTATGGGACGGAG | 22.45                                 | 29.57    | 59.43    |
| miR156 family  |                       | 21539.61                              | 15723.15 | 17281.67 |
| miR156a.1      | ACAGAAGAGAGTGAGCACA   | 0                                     | 0        | 11.34    |
| miR156a.2      | GACAGAAGAGAGTGAGCAC   | 0                                     | 16.01    | 0        |
| miR156a.3      | TGACAGAAGAGAGTGAGC    | 9894.55                               | 7297.93  | 8551.61  |
| miR156a.4      | TGACAGAAGAGAGTGAGCA   | 1524.98                               | 958.67   | 959.61   |
| miR156a.5      | TGACAGAAGAGAGTGAGCAC  | 9740.25                               | 7286.67  | 7434.18  |
| miR156a.6      | TGACAGAAGAGAGTGAGCACA | 379.83                                | 163.87   | 324.93   |
| miR159 family  |                       | 42273.78                              | 48560.66 | 40435.63 |
| miR159a.1      | TGGATTGAAGGGAGCTCTG   | 0                                     | 0        | 13.25    |
| miR159a.2      | TTGGATTGAAGGGAGCTCTG  | 46.84                                 | 31.37    | 9.56     |
| miR159a.3      | TTTGGATTGAAGGGAGCT    | 8042.17                               | 11496.05 | 9802.06  |
| miR159a.4      | TTTGGATTGAAGGGAGCTC   | 2161.7                                | 2497.01  | 1774.04  |
| miR159a.5      | TTTGGATTGAAGGGAGCTCT  | 4390.36                               | 6442.64  | 5159.53  |
| miR159a.6      | TTTGGATTGAAGGGAGCTCTG | 27632.71                              | 28093.59 | 23677.19 |
| miR166 family  |                       | 21086.86                              | 22964.34 | 18909.03 |
| miR166a.1      | CGGACCAGGCTTCATTCC    | 0                                     | 0        | 9.7      |
| miR166a.2      | CGGACCAGGCTTCATTCCCC  | 0                                     | 17.22    | 0        |
| miR166a.3      | GGACCAGGCTTCATTCCCC   | 0                                     | 15.42    | 0        |
| miR166a.4      | TCGGACCAGGCTTCATTC    | 1023.67                               | 931.61   | 840.17   |
| miR166a.5      | TCGGACCAGGCTTCATTCC   | 1864.28                               | 1694.53  | 1850.68  |
| miR166a.6      | TCGGACCAGGCTTCATTCCC  | 1342.04                               | 1920.68  | 1438.32  |
| miR166a.7      | TCGGACCAGGCTTCATTCCCC | 16856.87                              | 18384.88 | 14770.16 |
| miR168 family  |                       | 3172,43                               | 2088,39  | 2224,99  |
| miR168_3p.1    | CCCGCCTTGACCAAGTG     | 0                                     | 13.16    | 19.19    |
| miR168_3p.2    | CCCGCCTTGACCAAGTGAA   | 0                                     | 13.18    | 0        |
| miR168_3p.3    | CCCGCCTTGACCAAGTGAAT  | 194.11                                | 85.51    | 55.21    |
| miR168_3p.4    | CCGCCTTGACCAAGTGAAT   | 14.96                                 | 13.15    | 0        |
| miR168_5p.5    | CGCTTGGTGCAGATCGGGAC  | 0                                     | 17.55    | 0        |
| miR168_5p.6    | CTTGGTGCAGATCGGGAC    | 0                                     | 0        | 11.15    |
| miR168_5p.7    | GCTTGGTGCAGATCGGGAC   | 16.28                                 | 0        | 0        |
| miR168_5p.8    | TCGCTTGGTGCAGATCGGG   | 262.67                                | 161.82   | 189.52   |
| miR168_5p.9    | TCGCTTGGTGCAGATCGGGA  | 1049                                  | 528.64   | 616.96   |
| miR168_5p.10   | TCGCTTGGTGCAGATCGGGAC | 1635.41                               | 1255.38  | 1332.96  |
| miR171 family  |                       | 118                                   | 301.89   | 116.16   |
| miR171_3p.1    | TGATTGAGCCGTGCCAATA   | 16.85                                 | 41.95    | 23.28    |
| miR171_3p.2    | TGATTGAGCCGTGCCAATATC | 30.57                                 | 135.63   | 69.6     |

|                       |                        |               |                |                |
|-----------------------|------------------------|---------------|----------------|----------------|
| <b>miR171_3p.3</b>    | TTGAGCCGTGCCAATATC     | 14.03         | 0              | 0              |
| <b>miR171_5p.4</b>    | TGTTGGCTCGACTCACTC     | 15            | 29.05          | 0              |
| <b>miR171_5p.5</b>    | TGTTGGCTCGACTCACTCAG   | 0             | 29.17          | 0              |
| <b>miR171_5p.6</b>    | TGTTGGCTCGACTCACTCAGA  | 41.55         | 66.09          | 23.28          |
| <b>miR397 family</b>  |                        | <b>0</b>      | <b>0</b>       | <b>13.25</b>   |
| <b>miR397b_3p.1</b>   | ATCAACGCTGCACTCAACGGC  | 0             | 0              | 13.25          |
| <b>miR444 family</b>  |                        | <b>70.07</b>  | <b>76.04</b>   | <b>51.94</b>   |
| <b>miR444b.1</b>      | TGCAGTTGCTGTCTCAAGC    | 14.24         | 30.6           | 19.95          |
| <b>miR444b.2</b>      | TGCAGTTGCTGTCTCAAGCT   | 0             | 15.42          | 0              |
| <b>miR444b.3</b>      | TGCAGTTGCTGTCTCAAGCTT  | 55.83         | 30.02          | 31.99          |
| <b>miR5048 family</b> |                        | <b>1739.1</b> | <b>1812.47</b> | <b>1518.54</b> |
| <b>miR5048a.1</b>     | TATTTGCAGGTTTTAGGT     | 53.74         | 154.47         | 48.46          |
| <b>miR5048a.2</b>     | TATTTGCAGGTTTTAGGTC    | 362.74        | 334.34         | 380.42         |
| <b>miR5048a.3</b>     | TATTTGCAGGTTTTAGGTCT   | 244.76        | 173.97         | 222.25         |
| <b>miR5048a.44</b>    | TATTTGCAGGTTTTAGGTCTA  | 202.74        | 92.03          | 92.4           |
| <b>miR5048a.5</b>     | TATTTGCAGGTTTTAGGTCTAA | 496.67        | 492.16         | 392.17         |
| <b>miR5048a.6</b>     | TTGCAGGTTTTAGGTCTA     | 8.42          | 0              | 9.5            |
| <b>miR5048a.7</b>     | TTTGCAGGTTTTAGGTCT     | 105.5         | 90.18          | 16.4           |
| <b>miR5048a.8</b>     | TTTGCAGGTTTTAGGTCTA    | 264.53        | 475.32         | 356.94         |
| <b>miR5049 family</b> |                        | <b>8.46</b>   | <b>15.9</b>    | <b>19.39</b>   |
| <b>miR5049e.1</b>     | AATTATTTAGGTACAGAGG    | 0             | 0              | 9.7            |
| <b>miR5049e.2</b>     | AATTATTTAGGTACAGAGGGA  | 8.46          | 15.9           | 9.7            |
| <b>miR5051 family</b> |                        | <b>641.65</b> | <b>560.27</b>  | <b>476.2</b>   |
| <b>miR5051.1</b>      | TTTGGCACCTTGAAACTG     | 0             | 0              | 13.25          |
| <b>miR5051.2</b>      | TTTGGCACCTTGAAACTGG    | 16.84         | 13.16          | 0              |
| <b>miR5051.3</b>      | TTTGGCACCTTGAAACTGGG   | 115.21        | 55.39          | 42.76          |
| <b>miR5051.4</b>      | TTTGGCACCTTGAAACTGGGA  | 509.6         | 491.72         | 420.2          |
| <b>miR6200 family</b> |                        | <b>0</b>      | <b>0</b>       | <b>21.59</b>   |
| <b>miR6200.1</b>      | TTGGCCAAGTAGATCTAT     | 0             | 0              | 10.25          |
| <b>miR6200.2</b>      | TTGGCCAAGTAGATCTATG    | 0             | 0              | 11.34          |
| <b>miR6201 family</b> |                        | <b>111.35</b> | <b>78.47</b>   | <b>88.36</b>   |
| <b>miR6201.1</b>      | TGACCCTGAGGCACTCATA    | 0             | 0              | 9.56           |
| <b>miR6201.2</b>      | TGACCCTGAGGCACTCATAC   | 25.05         | 0              | 10.25          |
| <b>miR6201.3</b>      | TGACCCTGAGGCACTCATACC  | 15            | 49.9           | 0              |
| <b>miR6201.4</b>      | TGACCCTGAGGCACTCATACCG | 71.3          | 28.57          | 68.55          |
