# Supplementary material for: Barley Seeds miRNome Stability during Long-Term Storage and Aging
Source: MDPI journal article supplement (doi:10.3390/ijms22094315), 2021-04-21
Supplement: s1 [file s1]

Table S9. Primers used in the RT-qPCR of miRNA

| Name of primers        | Sequence 5'→3'                | T <sub>m</sub> [°C] |
|------------------------|-------------------------------|---------------------|
| <b>Reference miRNA</b> |                               |                     |
| <b>mir159</b>          | TTTGGATTGAAGGGAGCTCTG         |                     |
| <b>miR159_R3</b>       | GGTCCAGTTTTTTTTTTTTTTTCAG     | 49.5                |
| <b>miR159_F2</b>       | GCGCAGTTTGGATTGAAG            | 48.0                |
| <b>mir166</b>          | TCGGACCAGGCTTCATTCCCC         |                     |
| <b>miR166_R1</b>       | CAGTTTTTTTTTTTTTTTGGGGAATG    | 50.1                |
| <b>miR166_F4</b>       | CAGTCGGACCAGGCT               | 47.4                |
| <b>mir168</b>          | CCCGCCTTGCACCAAGTGAAT         |                     |
| <b>miR168_R1</b>       | GGTCCAGTTTTTTTTTTTTTTTATTCACT | 51.6                |
| <b>miR168_F3</b>       | CCCGCCTTGCACCA                | 46.2                |
| <b>Explored miRNA</b>  |                               |                     |
| <b>hvu-new2_R_1</b>    | GTCCAGTTTTTTTTTTTTTTTAGGAATG  | 51.1                |
| <b>hvu-new2_F_2</b>    | GCAGAAGTCCTCGTGTTG            | 50.3                |
| <b>hvu-new41_R_1</b>   | GGTCCAGTTTTTTTTTTTTTTTAGC     | 49.5                |
| <b>hvu-new41_F_1</b>   | CCCAACGGGCGGT                 | 46.0                |
| <b>hvu-new48_R_1</b>   | GTCCAGTTTTTTTTTTTTTTCCTC      | 49.5                |
| <b>hvu-new48_F_2</b>   | AGCGCAGTCTTATGTTGTG           | 48.9                |
| <b>hvu-new60_R_1</b>   | TCCAGTTTTTTTTTTTTTCTCCTC      | 50.1                |
| <b>hvu-new60_F_3</b>   | GGAAGGGGCATGCAG               | 47.4                |
| <b>hvu-new69_R_2</b>   | GTCCAGTTTTTTTTTTTTTTCAGTTC    | 50.6                |
| <b>hvu-new69_F_2</b>   | GCAGTCCACAGCTTCTTG            | 51.8                |
| <b>miR156*_R_1</b>     | TCCAGTTTTTTTTTTTTTTGTGCT      | 47.8                |
| <b>miR156*_F_2</b>     | GCAGTGACAGAAGAGAGTGA          | 51.8                |
| <b>miR171e_R_1</b>     | CCAGTTTTTTTTTTTTTTATTGGCA     | 48.5                |
| <b>miR171e_F_2</b>     | GCAGTGATTGAGCCGT              | 45.9                |
| <b>miR171d_R_3</b>     | AGGTCCAGTTTTTTTTTTTTTTGAT     | 48.5                |
| <b>miR171d_F_1</b>     | TGATTGAGCCGTGCCA              | 45.9                |
| <b>miR171c_R_1</b>     | TCCAGTTTTTTTTTTTTTTGAGTGA     | 48.5                |
| <b>miR171c_F_4</b>     | GCAGTGTGGCTCGAC               | 48.5                |
| <b>miR171b_R_4</b>     | GGTCCAGTTTTTTTTTTTTTTCTG      | 49.5                |
| <b>miR171b_F_2</b>     | GTGTTGGCTCGACTCAC             | 49.5                |
