# Supplementary material for: Barley Seeds miRNome Stability during Long-Term Storage and Aging
Source: MDPI journal article supplement (doi:10.3390/ijms22094315), 2021-04-21
Supplement: s1 [file s1]

**Table S4.** An average level of expression of novel miRNAs identified in the tested seed samples [Rc - renewed seeds; Hv - seeds with high viability; Lv - seeds with low viability]

| name      | mature sequence miRNA   | averaged level of expression RPM |      |      |
|-----------|-------------------------|----------------------------------|------|------|
|           |                         | Rc                               | Hv   | Lv   |
| hvu-new1  | AAGCTCAGGAGGGATAGCGCC   | 0.09                             | 0.06 | 0.00 |
| hvu-new2  | AAGTCCTCGTGTTCATTCT     | 0.00                             | 2.00 | 3.43 |
| hvu-new3  | ACACGCGTGATGTGGTCTCTT   | 0.48                             | 0.12 | 0.50 |
| hvu-new4  | ACTGTTGTCGGCCGCGTCGGT   | 0.98                             | 0.99 | 1.17 |
| hvu-new5  | AGTCCTCGTGTTCATTCT      | 3.70                             | 1.80 | 0.76 |
| hvu-new6  | AGTGGTGATGAAAATGCTCT    | 0.41                             | 0.16 | 0.73 |
| hvu-new7  | ATGCGGGATGAACCGGAAGT    | 0.14                             | 0.00 | 0.05 |
| hvu-new8  | ATGGAGGTAGACGGAAACGGA   | 0.11                             | 0.00 | 0.00 |
| hvu-new9  | ATGGGACTGAAGTTTACCTCT   | 0.05                             | 0.00 | 0.08 |
| hvu-new10 | ATGGGACTGAAGTTTACCTCTT  | 0.04                             | 0.04 | 0.18 |
| hvu-new11 | ATTTGTAGTGTTCGGATTGAGT  | 0.14                             | 0.16 | 0.21 |
| hvu-new12 | CAGTTCTTCTGTCCACATCG    | 0.03                             | 0.06 | 0.00 |
| hvu-new13 | CATGACTCTCGGCAACGGATA   | 0.10                             | 0.31 | 0.39 |
| hvu-new14 | CCCATGTGCGCACGGATTCTGA  | 3.98                             | 2.36 | 3.15 |
| hvu-new15 | CCTGGGAAGTCCTCGTGTTA    | 0.05                             | 0.12 | 0.09 |
| hvu-new16 | CCTGTTTGTCTATTAAATTTCTT | 0.09                             | 0.05 | 0.05 |
| hvu-new17 | CGAAAGATGGTGAACATATGT   | 0.00                             | 0.18 | 0.24 |
| hvu-new18 | CGGCAGTGAGGAGAGACAGA    | 0.09                             | 0.06 | 0.07 |
| hvu-new19 | CGGGGTGTGGACTGTTGTCA    | 0.27                             | 0.80 | 0.26 |
| hvu-new20 | CTCGCGAGCAACGGATGAATC   | 0.07                             | 0.08 | 0.26 |
| hvu-new21 | CTGGCAACAAATTAGAGTCTC   | 0.00                             | 0.05 | 0.00 |
| hvu-new22 | CTGGCAACAAATTAGAGTCTCT  | 0.06                             | 0.00 | 0.30 |
| hvu-new23 | CTGTTGAGCTTGACTCTAGTCT  | 1.90                             | 1.12 | 1.88 |
| hvu-new24 | CTTCCCAACGGGCGGTGGGCTA  | 0.00                             | 0.16 | 0.00 |
| hvu-new25 | GACTGTTGTCGGCCGCGTCA    | 0.04                             | 0.10 | 0.00 |
| hvu-new26 | GAGGGCGGCGATAACATTTTC   | 0.28                             | 0.29 | 0.09 |
| hvu-new27 | GCCAGGACTGTAACCATGTGT   | 0.03                             | 0.00 | 0.00 |
| hvu-new28 | GCCGACCTAGCTCAGTGGTA    | 1.24                             | 1.16 | 0.60 |
| hvu-new29 | GCGGAACGGCTCTTGCTGGTT   | 0.14                             | 0.00 | 0.12 |
| hvu-new30 | GGTGTGGACTGTTGTCGGCG    | 0.19                             | 0.29 | 0.16 |
| hvu-new31 | GTTGCCGTCGTCGACATGGT    | 0.19                             | 0.16 | 0.09 |
| hvu-new32 | TAAGGACTTAAAGTGGGCATT   | 0.05                             | 0.00 | 0.00 |
| hvu-new33 | TAATAAGCATGTCTTCAGATG   | 0.63                             | 0.50 | 0.47 |
| hvu-new34 | TAATGATCTTATCTCGGTGTTG  | 0.52                             | 0.00 | 0.00 |
| hvu-new35 | TATAAGTCTTTGTAGAGATC    | 0.06                             | 0.11 | 0.00 |
| hvu-new36 | TATTGGCTCGGCTCACTCAGG   | 0.19                             | 0.09 | 0.04 |
| hvu-new37 | TCAAGTGATGAGGAATAAACT   | 0.29                             | 0.30 | 0.18 |
| hvu-new38 | TCAGACTTCGCTGGGACATC    | 0.95                             | 0.40 | 0.51 |
| hvu-new39 | TCAGTGCGATCCCTCTGGAAT   | 0.17                             | 0.04 | 0.05 |

|           |                        |        |        |       |
|-----------|------------------------|--------|--------|-------|
| hvu-new40 | TCCACAGGCTTTCTTGAAGCTG | 8.79   | 7.06   | 5.77  |
| hvu-new41 | TCCCAACGGGCGGTGGGCTA   | 0.04   | 0.00   | 0.14  |
| hvu-new42 | TCCGTTGTAGTCTAGGTGGTT  | 0.11   | 0.07   | 0.04  |
| hvu-new43 | TCGCTTGGTGCAGATCGGGAC  | 1.83   | 1.34   | 0.96  |
| hvu-new44 | TCGGACCAGGCTTCAATCCCT  | 2.76   | 1.79   | 1.91  |
| hvu-new45 | TCGGACCAGGCTTCATTCCCC  | 74.93  | 63.18  | 62.37 |
| hvu-new46 | TCGGACCAGGCTTCATTCCCT  | 7.29   | 5.45   | 5.73  |
| hvu-new47 | TCTGGATGTTGATTAGATGTT  | 0.17   | 0.03   | 0.00  |
| hvu-new48 | TCTTATGTTGTGGGACGGAGG  | 0.32   | 0.10   | 0.00  |
| hvu-new49 | TGAAGCTGCCAGCATGATCT   | 1.50   | 0.40   | 0.00  |
| hvu-new50 | TGAAGCTGCCAGCATGATCTA  | 0.59   | 0.46   | 0.90  |
| hvu-new51 | TGAAGCTGCCAGCATGATCTG  | 0.83   | 0.48   | 0.21  |
| hvu-new52 | TGAAGCTGCCAGCATGATCTGA | 13.83  | 11.33  | 12.29 |
| hvu-new53 | TGAAGCTGCCAGCATGATCTGC | 0.00   | 0.04   | 0.13  |
| hvu-new54 | TGACAGAAGAGAGTGAGCAC   | 43.49  | 31.99  | 25.08 |
| hvu-new55 | TGAGCTTGACTCTAGTCCGACC | 0.15   | 0.12   | 0.09  |
| hvu-new56 | TGAGGAAGGACTGCATCATCT  | 0.05   | 0.13   | 0.10  |
| hvu-new57 | TGCAGCGCCGGTGAACCGCTCC | 0.00   | 0.11   | 0.08  |
| hvu-new58 | TGCGGTGATGAATTATGAATT  | 0.10   | 0.18   | 0.12  |
| hvu-new59 | TGCTGTGATGAATCGCAAGGAC | 0.03   | 0.04   | 0.10  |
| hvu-new60 | TGGAAGGGGCATGCAGAGGAG  | 0.66   | 0.00   | 0.00  |
| hvu-new61 | TGGACGTGGAGGTGCAGCTGC  | 0.20   | 0.00   | 0.00  |
| hvu-new62 | TGGACTGAAGGGAGCTCCCTC  | 7.18   | 7.32   | 5.93  |
| hvu-new63 | TGGAGAAGCAGGGCACGTGCT  | 0.00   | 0.07   | 0.04  |
| hvu-new64 | TGGAGGTAGACGGAAACGGAG  | 0.31   | 0.18   | 0.00  |
| hvu-new65 | TGGCCTGTCAAGTACGCGTGC  | 0.07   | 0.00   | 0.00  |
| hvu-new66 | TTAAATTTCTCCATAGCATCA  | 0.25   | 0.58   | 0.75  |
| hvu-new67 | TTACGGATGTAGTATCATACT  | 0.03   | 0.06   | 0.00  |
| hvu-new68 | TTCATCGGTGAGTAAGGTCC   | 0.06   | 0.08   | 0.00  |
| hvu-new69 | TTCCACAGCTTTCTTGAAGCTG | 0.60   | 0.08   | 0.42  |
| hvu-new70 | TTGAACTGTTTCTCTGAAAT   | 0.09   | 0.07   | 0.08  |
| hvu-new71 | TTGAGCCGTGCCAATATCTCT  | 0.10   | 0.06   | 0.03  |
| hvu-new72 | TTGAGGAAGGACTGCATCATC  | 0.05   | 0.00   | 0.00  |
| hvu-new73 | TTGAGTGCAGCGTTGATGAAC  | 0.62   | 0.00   | 0.00  |
| hvu-new74 | TTGATTCGCGGCTCATCTTGC  | 26.79  | 16.75  | 15.93 |
| hvu-new75 | TTGGACGTGGAGGTGCAGCTG  | 0.10   | 0.06   | 0.03  |
| hvu-new76 | TTGGCATTCTGTCCACCTCC   | 0.60   | 0.40   | 0.38  |
| hvu-new77 | TTGTCTAGAAATGAATGTATTT | 0.05   | 0.00   | 0.09  |
| hvu-new78 | TTGTCTAGATATGAATGTTC   | 0.04   | 0.00   | 0.07  |
| hvu-new79 | TTGTCTAGATATGAATGTTT   | 0.43   | 0.30   | 0.18  |
| hvu-new80 | TTTGATTGAAGGGAGCTCTG   | 124.76 | 103.36 | 97.81 |
| hvu-new81 | TTTGACACCTTGAAACTGGGA  | 0.60   | 0.37   | 0.37  |
