# Supplementary material for: Barley Seeds miRNome Stability during Long-Term Storage and Aging
Source: MDPI journal article supplement (doi:10.3390/ijms22094315), 2021-04-21
Supplement: s1 [file s1]

**Table S1.** Known miRNAs identified in the tested seed samples [Rc - renewed seeds; Hv - seeds with high viability; Lv - seeds with low viability]

| <b>miRNA Sequence</b> | <b>Rc</b> | <b>Lv</b> | <b>Hv</b> |
|-----------------------|-----------|-----------|-----------|
| miR1120.1             |           | +         |           |
| miR1120.2             | +         | +         | +         |
| miR156a.1             |           |           | +         |
| miR156a.2             |           | +         |           |
| miR156a.3             | +         | +         | +         |
| miR156a.4             | +         | +         | +         |
| miR156a.5             | +         | +         | +         |
| miR156a.6             | +         | +         | +         |
| miR159a.1             |           |           | +         |
| miR159a.2             | +         | +         | +         |
| miR159a.3             | +         | +         | +         |
| miR159a.4             | +         | +         | +         |
| miR159a.5             | +         | +         | +         |
| miR159a.6             | +         | +         | +         |
| miR166a.1             |           |           | +         |
| miR166a.2             |           | +         |           |
| miR166a.3             |           | +         |           |
| miR166a.4             | +         | +         | +         |
| miR166a.5             | +         | +         | +         |
| miR166a.6             | +         | +         | +         |
| miR166a.7             | +         | +         | +         |
| miR168_3p.1           |           | +         | +         |
| miR168_3p.2           |           | +         |           |
| miR168_3p.3           | +         | +         | +         |
| miR168_3p.4           | +         | +         |           |
| miR168_5p.5           |           | +         |           |
| miR168_5p.6           |           |           | +         |
| miR168_5p.7           | +         |           |           |
| miR168_5p.8           | +         | +         | +         |
| miR168_5p.9           | +         | +         | +         |
| miR168_5p.10          | +         | +         | +         |
| miR171_3p.1           | +         | +         | +         |
| miR171_3p.2           | +         | +         | +         |
| miR171_3p.3           | +         |           |           |
| miR171_5p.4           | +         | +         |           |
| miR171_5p.5           |           | +         |           |
| miR171_5p.6           | +         | +         | +         |
| miR397b_3p.1          |           |           | +         |
| miR444b.1             | +         | +         | +         |
| miR444b.2             |           | +         |           |
| miR444b.3             | +         | +         | +         |

|             |   |   |   |
|-------------|---|---|---|
| miR5048a.1  | + | + | + |
| miR5048a.2  | + | + | + |
| miR5048a.3  | + | + | + |
| miR5048a.44 | + | + | + |
| miR5048a.5  | + | + | + |
| miR5048a.6  | + |   | + |
| miR5048a.7  | + | + | + |
| miR5048a.8  | + | + | + |
| miR5049e.1  |   |   | + |
| miR5049e.2  | + | + | + |
| miR5051.1   |   |   | + |
| miR5051.2   | + | + |   |
| miR5051.3   | + | + | + |
| miR5051.4   | + | + | + |
| miR6200.1   |   |   | + |
| miR6200.2   |   |   | + |
| miR6201.1   |   |   | + |
| miR6201.2   | + |   | + |
| miR6201.3   | + | + |   |
| miR6201.4   | + | + | + |
